# Supplementary material for: Metabolomic study of saxitoxin analogues and biosynthetic intermediates in dinoflagellates using 15N-labelled sodium nitrate as a nitrogen source
Source: PubMed Central journal article supplement (PMC6401167; doi:10.1038/s41598-019-39708-y), 2019-03-05
Supplement: 41598_2019_39708_MOESM1_ESM.pdf [file 41598_2019_39708_MOESM1_ESM.pdf]

## Supplementary Information

Metabolomic study of saxitoxin analogues and biosynthetic intermediates in dinoflagellates using <sup>15</sup>N-labelled sodium nitrate as a nitrogen source

Yuko Cho<sup>\*1</sup>, Shigeki Tsuchiya<sup>1</sup>, Takuo Omura<sup>2</sup>, Kazuhiko Koike<sup>3</sup>, Hiroshi Oikawa<sup>4</sup>, Keiichi Konoki<sup>1</sup>, Yasukatsu Oshima<sup>5, \*\*</sup> and Mari Yotsu-Yamashita<sup>1</sup>

<sup>1</sup> Graduate School of Agricultural Science, Tohoku University, 468-1 Aramaki Aza Aoba, Aoba-ku, Sendai, Miyagi, 980-8572, Japan

<sup>2</sup> Laboratory of Aquatic Science Consultant Co., LTD. 2-30-17, Higashikamata, Ota-ku, Tokyo, 144-0031, Japan

<sup>3</sup> Graduate School of Biosphere Science, Hiroshima University, 1-4-4 Kagamiyama, Higashi-Hiroshima, 739-8528, Japan

<sup>4</sup> National Research Institute of Fisheries Science, Japan Fisheries Research and Education Agency, 2-12-4 Fukuura, Kanazawa, Yokohama, Kanagawa 236-8648, Japan

<sup>5</sup> Graduate School of Life Sciences, Tohoku University, 2-1-1 Katahira, Aoba-ku, Sendai 980-8577, Japan.

## Table of contents

|                                                                                                                                                                                                                                 |     |
|---------------------------------------------------------------------------------------------------------------------------------------------------------------------------------------------------------------------------------|-----|
| Figure S-1. Isotope patterns of the labelled biosynthetic intermediates (arginine, Int-A', and Int-C'2) on Day 10                                                                                                               | S3  |
| Figure S-2. Isotope patterns of the labelled biosynthetic intermediates (11-hydroxy-Int-C'2, Int-E', and Cyclic-C') on Day 10                                                                                                   | S4  |
| Figure S-3. Isotope patterns of the labelled STX analogues (C1, C2, GTX4, and GTX5) on Day 10                                                                                                                                   | S5  |
| Figure S-4. MS/MS spectra of non-labelled (A) and perfectly labelled (B) arginine                                                                                                                                               | S6  |
| Figure S-5. MS/MS spectra of non-labelled (A) and perfectly labelled (B) Int-A'                                                                                                                                                 | S7  |
| Figure S-6. MS/MS spectra of non-labelled (A) and perfectly labelled (B) Int-C'2                                                                                                                                                | S8  |
| Figure S-7. MS/MS spectra of non-labelled (A) and perfectly labelled (B) Int-C'2                                                                                                                                                | S9  |
| Figure S-8. MS/MS spectra of non-labelled (A) and perfectly labelled (B) Int-C'2                                                                                                                                                | S10 |
| Figure S-9. MS/MS spectra of non-labelled (A) and perfectly labelled (B) Int-C'2                                                                                                                                                | S11 |
| Figure S-10. MS/MS spectra of non-labelled (A) and perfectly labelled (B) GTX5                                                                                                                                                  | S12 |
| Figure S-11. MS/MS spectra of non-labelled (A) and perfectly labelled (B) C2-SO <sub>3</sub>                                                                                                                                    | S13 |
| Figure S-12. MS/MS spectra of non-labelled (A) and perfectly labelled (B) GTX4                                                                                                                                                  | S14 |
| Figure S-13. Relative abundance % of each isotopomer of the biosynthetic intermediates in <i>A. catenella</i> after a 2-month passage in <sup>15</sup> N-NaNO <sub>3</sub> medium                                               | S15 |
| Figure S-14. Growth curve of <i>A. catenella</i> cultured with <sup>15</sup> N-NO <sub>3</sub> or <sup>14</sup> N-NO <sub>3</sub>                                                                                               | S16 |
| Figure S-15. Day-10 toxin contents of <i>A. catenella</i> cultured in <sup>15</sup> N-NaNO <sub>3</sub> or <sup>14</sup> N-NO <sub>3</sub>                                                                                      | S17 |
| Figure S-16. Relative % of peak area of each isotopomer of the precursor and the biosynthetic intermediates at 3, 6, and 10 days after the addition of <sup>15</sup> N-NO <sub>3</sub> medium to <i>A. catenella</i>            | S18 |
| Figure S-17. Relative % of peak area of each isotopomer the biosynthetic intermediates, 11-hydroxyl-Int-C'2 and Int-E' at 3, 6, and 10 days after the addition of <sup>15</sup> N-NO <sub>3</sub> medium to <i>A. catenella</i> | S19 |
| Figure S-18. Relative % of peak of each isotopomer of the STXs at 3, 6, and 10 days after the addition of <sup>15</sup> N-NO <sub>3</sub> medium in <i>A. catenella</i>                                                         | S20 |
| Figure S-19. Three populations stochastically predicted by empirical relative % of each isotopomer on Day 6                                                                                                                     | S21 |
| Figure S-20. Three populations stochastically predicted by empirical relative % of each isotopomer on Day 10                                                                                                                    | S22 |
| Figure S-21. Three populations stochastically predicted by empirical relative % of each isotopomer on Day 6                                                                                                                     | S23 |
| Figure S-22. Three populations stochastically predicted by empirical relative % of each isotopomer on Day 10                                                                                                                    | S24 |
| Figure S-23. HILIC-MS-MRM chromatogram of toxic <i>G. catenatum</i> extract                                                                                                                                                     | S25 |
| Figure S-24. HILIC-MS-MRM chromatogram of non-toxic <i>A. insuetum</i> extract                                                                                                                                                  | S26 |
| Table S-1. The theoretical values for the isotopomers with different number of <sup>15</sup> N                                                                                                                                  | S27 |
| Table S-2. Clean up conditions employed for Chromabond <sup>R</sup> HILIC and the resulting recovered compounds                                                                                                                 | S28 |
| Table S-3. Example of calculation of peak areas removing the contribution of the naturally occurring stable isotope                                                                                                             | S29 |
| Table S-4. Production rate (nM/d)                                                                                                                                                                                               | S30 |
| Table S-5. <sup>15</sup> N incorporation and their ratio calculated by three-population model for the isotopomer distribution % of Day 6 and Day 10                                                                             | S31 |
| Table S-6. The detection limits (fmol/cell) for non-toxic species <i>A. insuetum</i> and <i>P. triestinum</i>                                                                                                                   | S32 |
| Optimization of Chromabond <sup>R</sup> HILIC SPE conditions using the non-labelled standard                                                                                                                                    | S33 |
| Optimized sample clean-up for HR HILIC-ESI-Q-tof-MS and MS/MS                                                                                                                                                                   | S34 |
| The linearity of modified column-switching HR HILIC-ESI-Q-tof-MS                                                                                                                                                                | S35 |
| Validation by the highly labelled sample mixed with the non-labelled standard                                                                                                                                                   | S36 |
| Calculation of peak area removing the contribution of the naturally occurring stable isotopes                                                                                                                                   | S37 |
| Quantitation of the biosynthetic intermediates, the shunt product, and STXs in non-toxic and toxic dinoflagellates using column-switching HILIC- MS/MS (MRM)                                                                    | S38 |

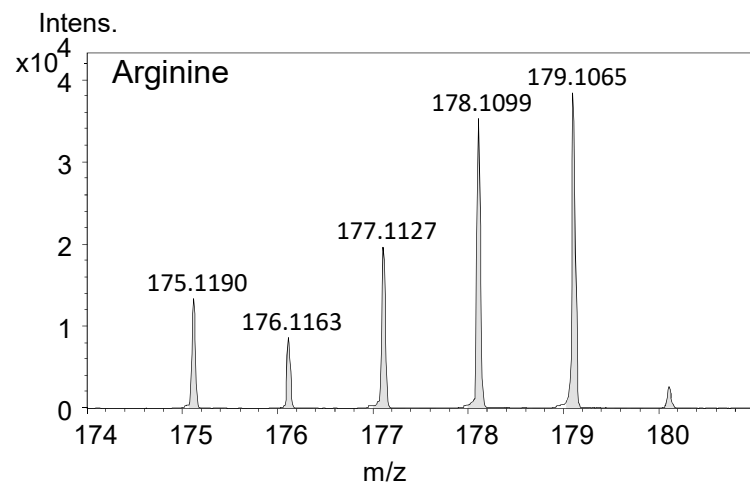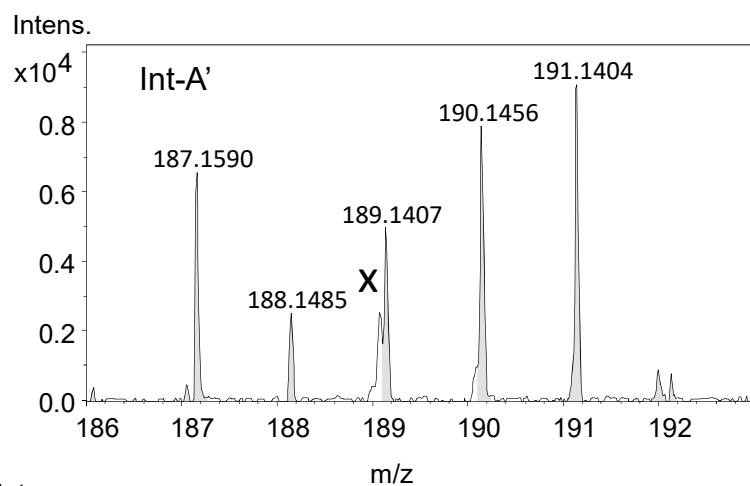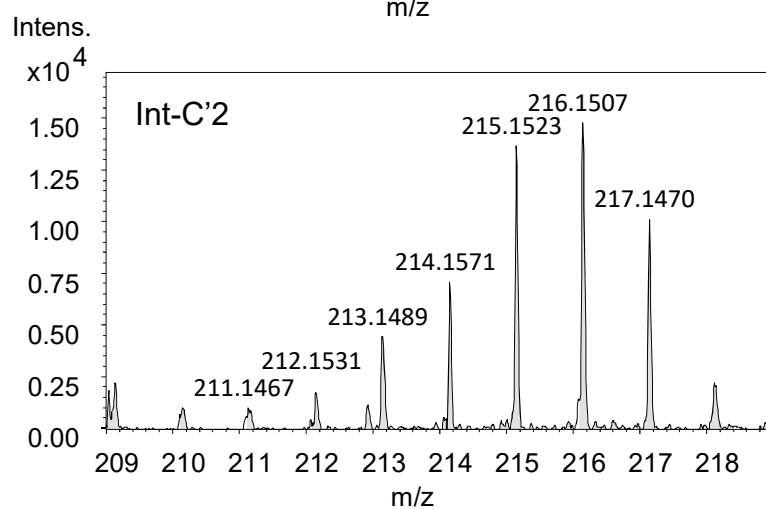

Figure S-1. Isotope patterns of the labelled biosynthetic intermediates (arginine, Int-A', and Int-C'2) on Day 10

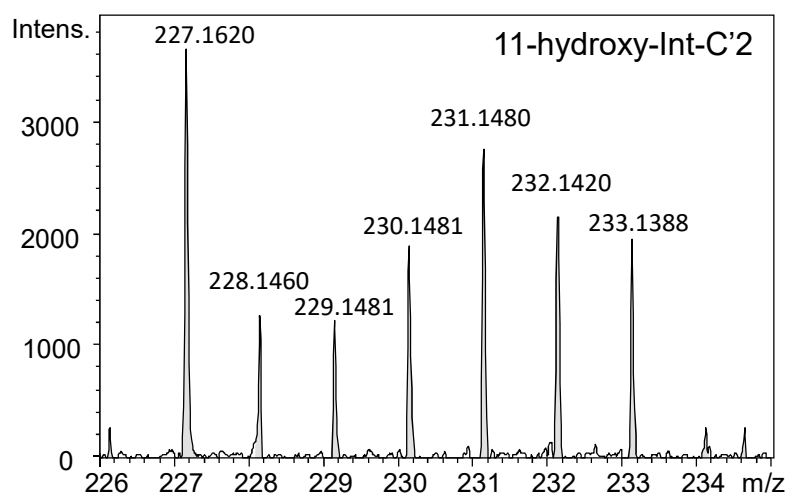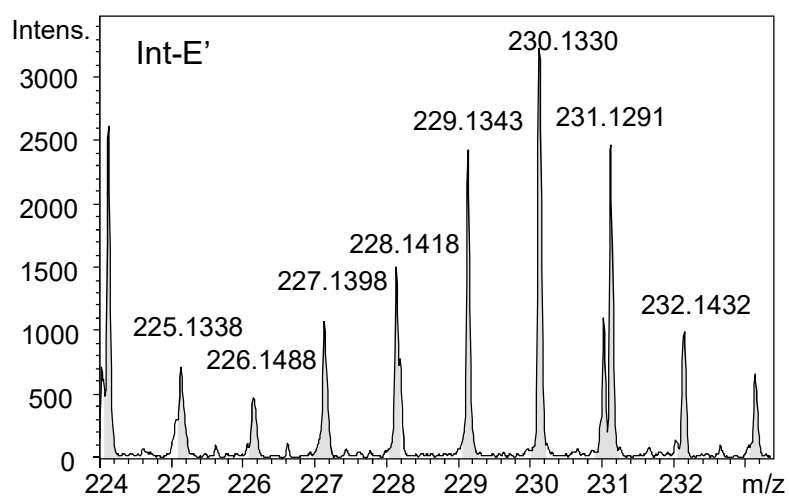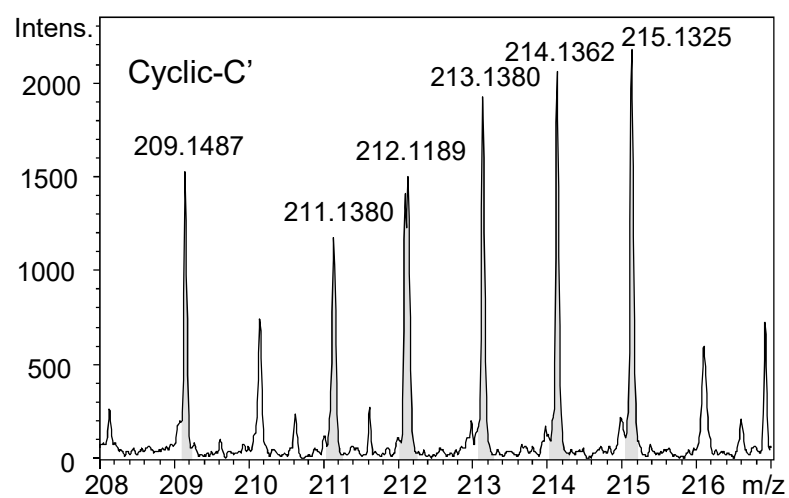

Figure S-2. Isotope patterns of the labelled biosynthetic intermediates (11-hydroxy-Int-C'2, Int-E', and Cyclic-C') on Day 10

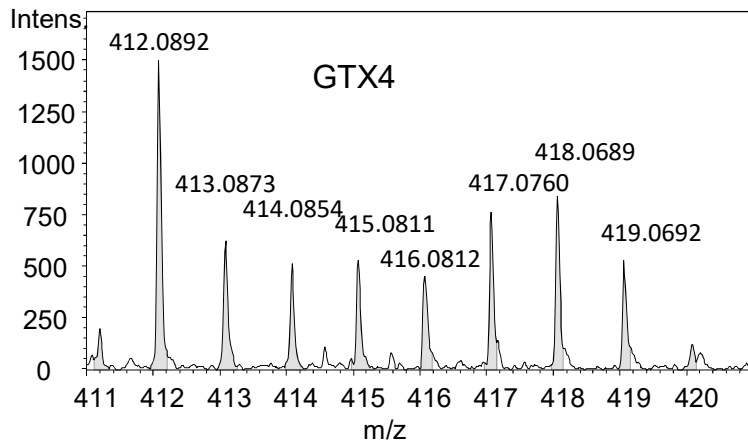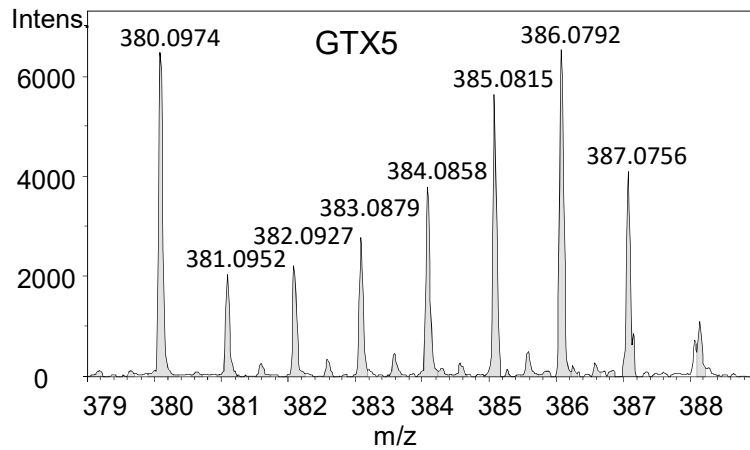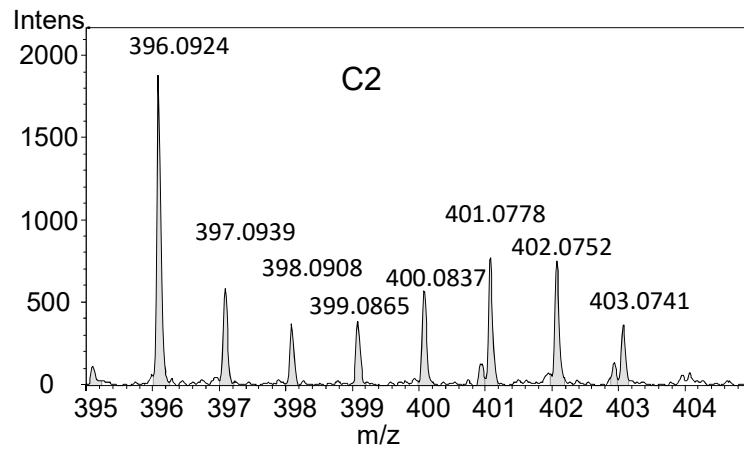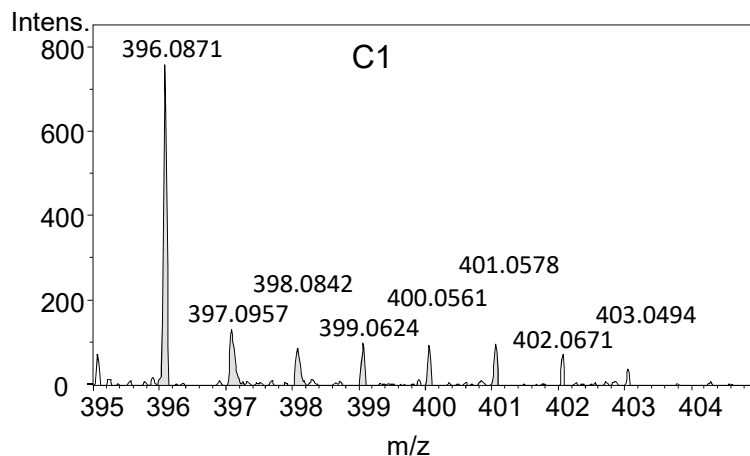

Figure S-3. Isotope patterns of the labelled STX analogues (C1, C2, GTX4, and GTX5) on Day 10

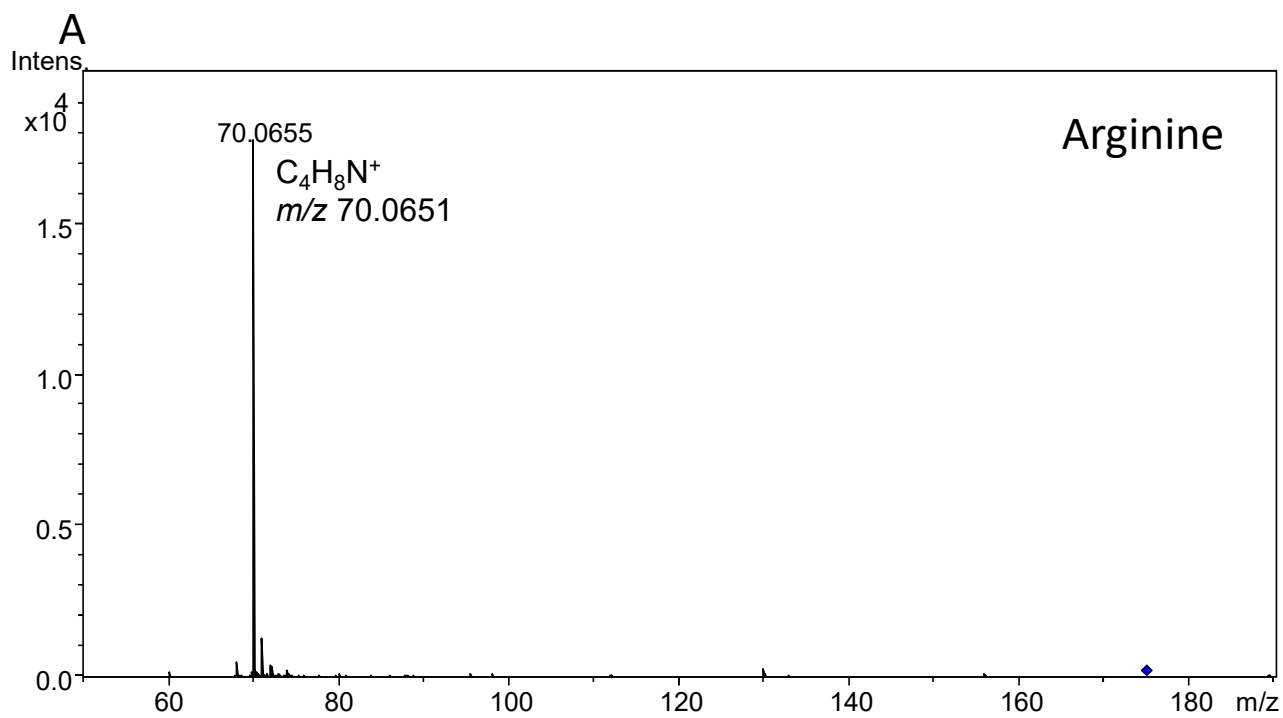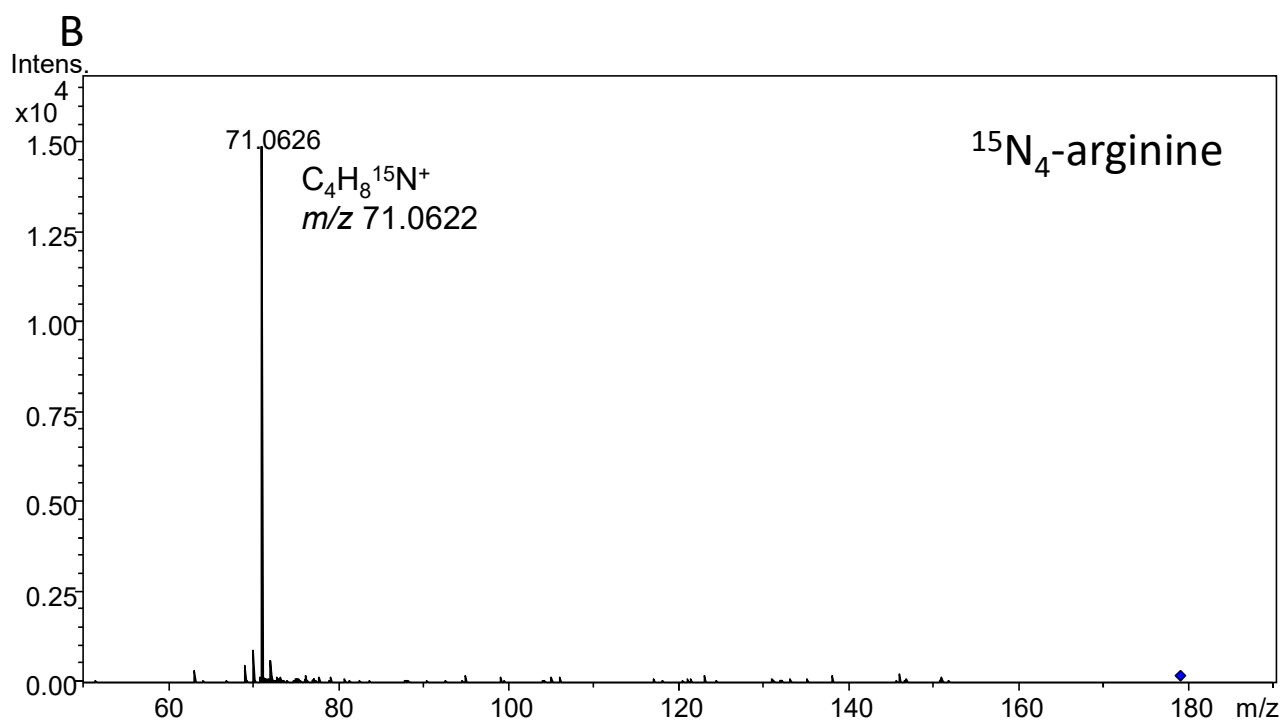

Figure S-4. MS/MS spectra of non-labelled (A) and perfectly labelled (B) arginine

A

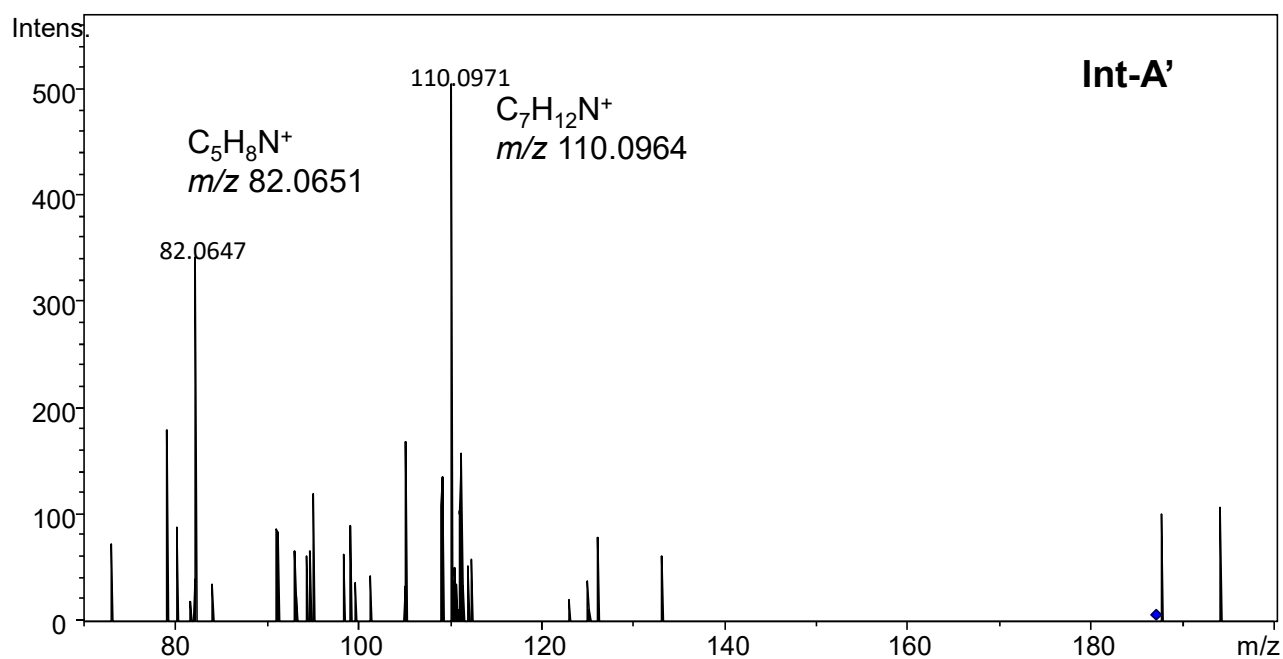

B

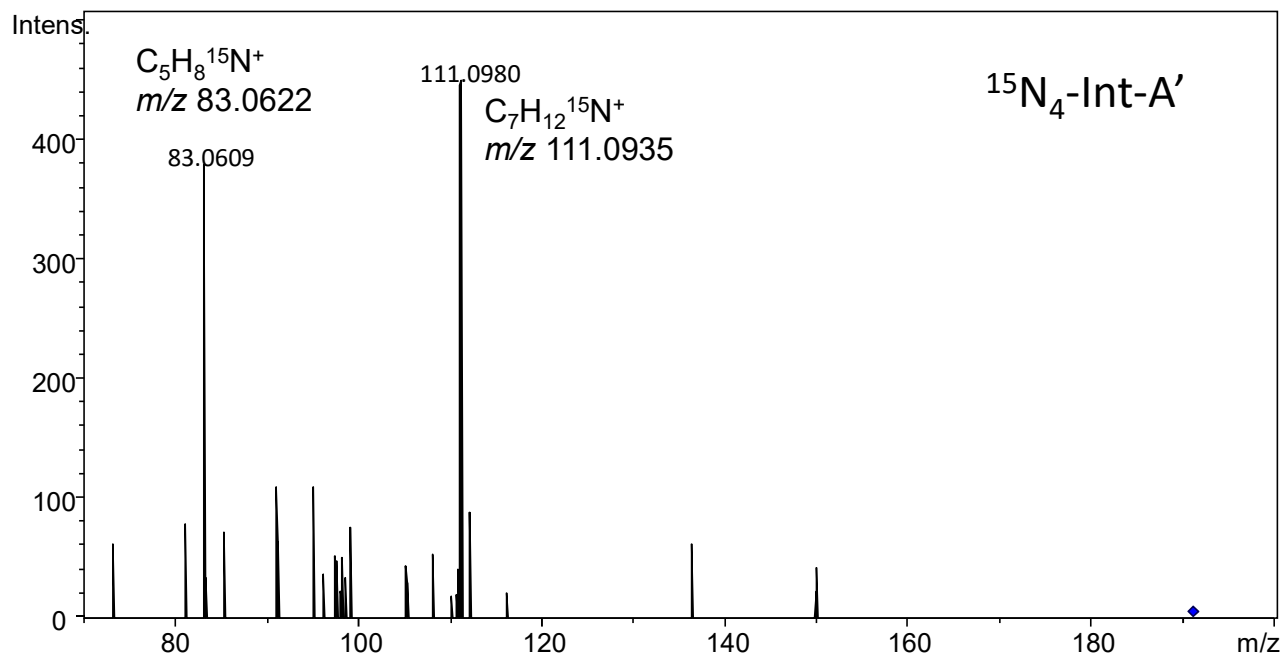

Figure S-5. MS/MS spectra of non-labelled (A) and perfectly labelled (B) Int-A'

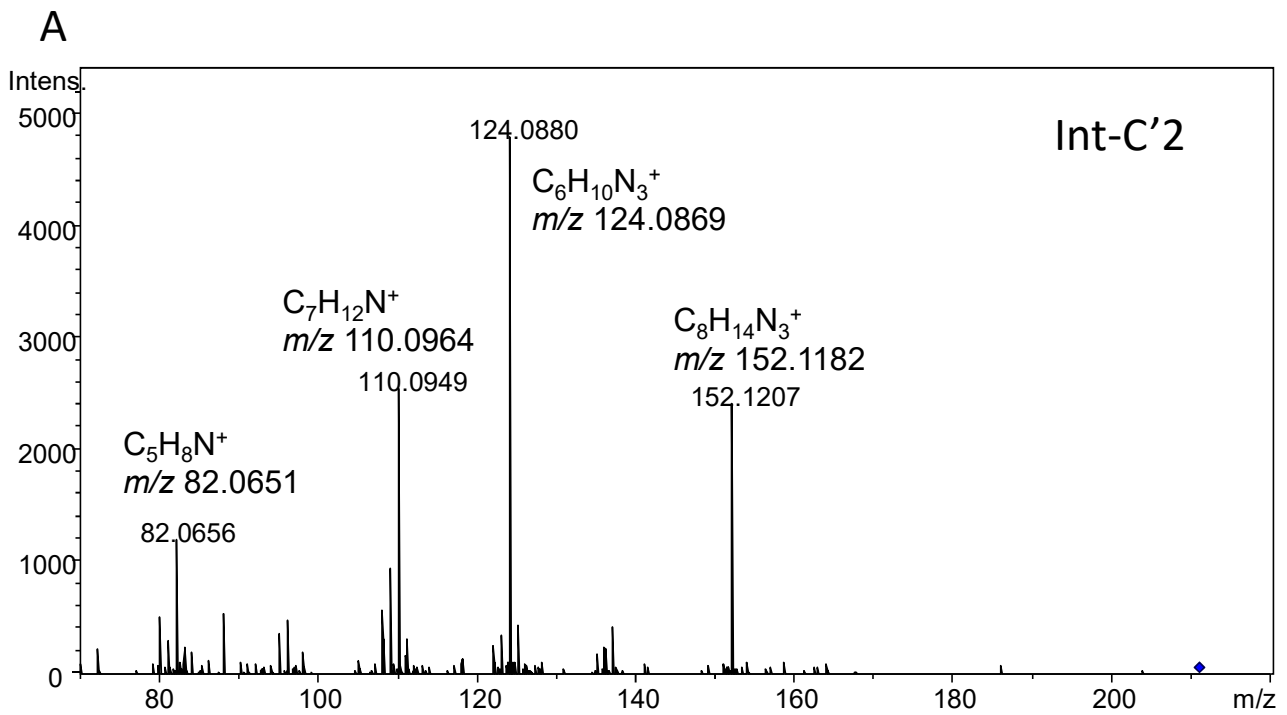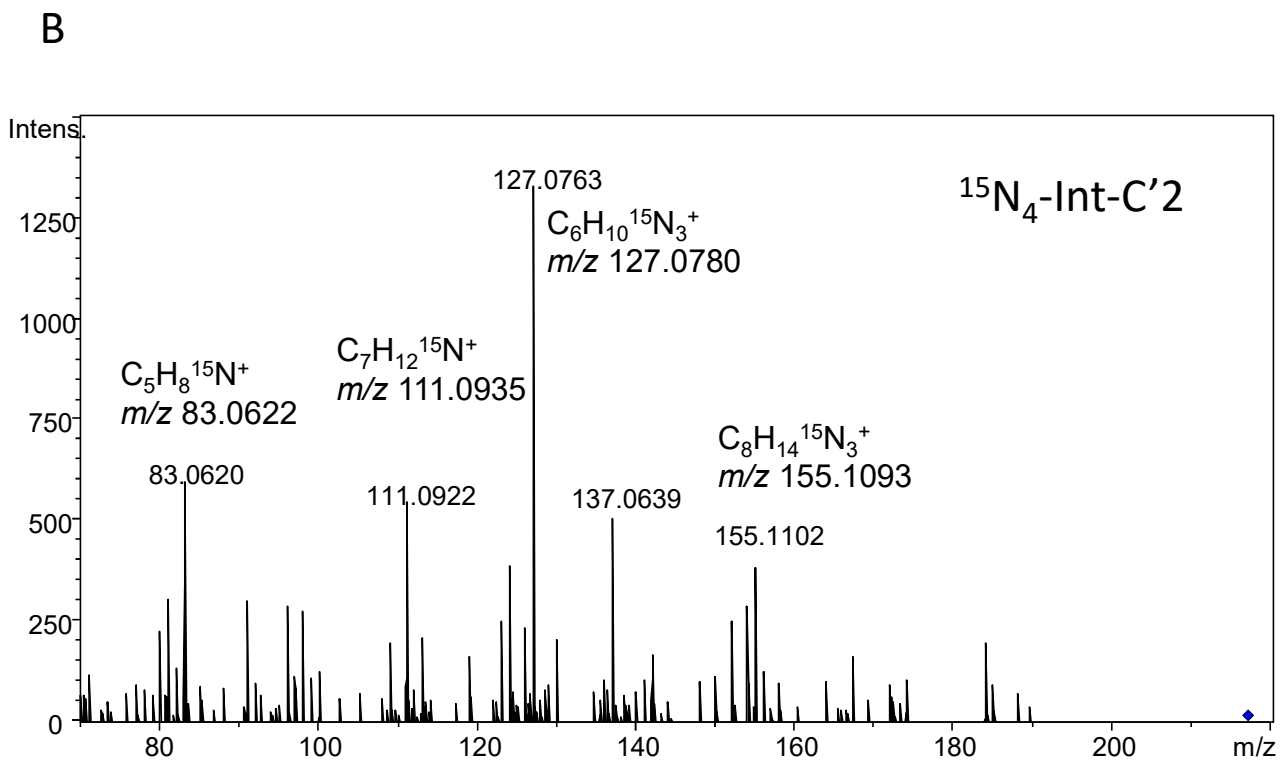

Figure S-6. MS/MS spectra of non-labelled (A) and perfectly labelled (B) Int-C'2



A

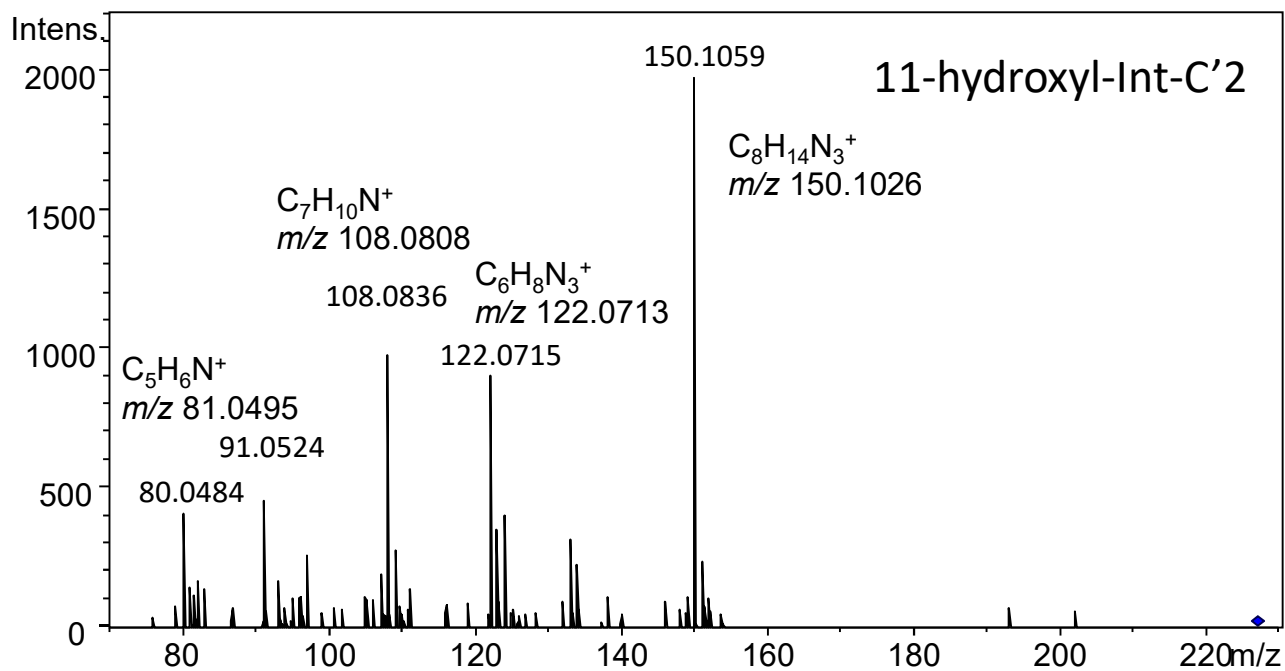

B

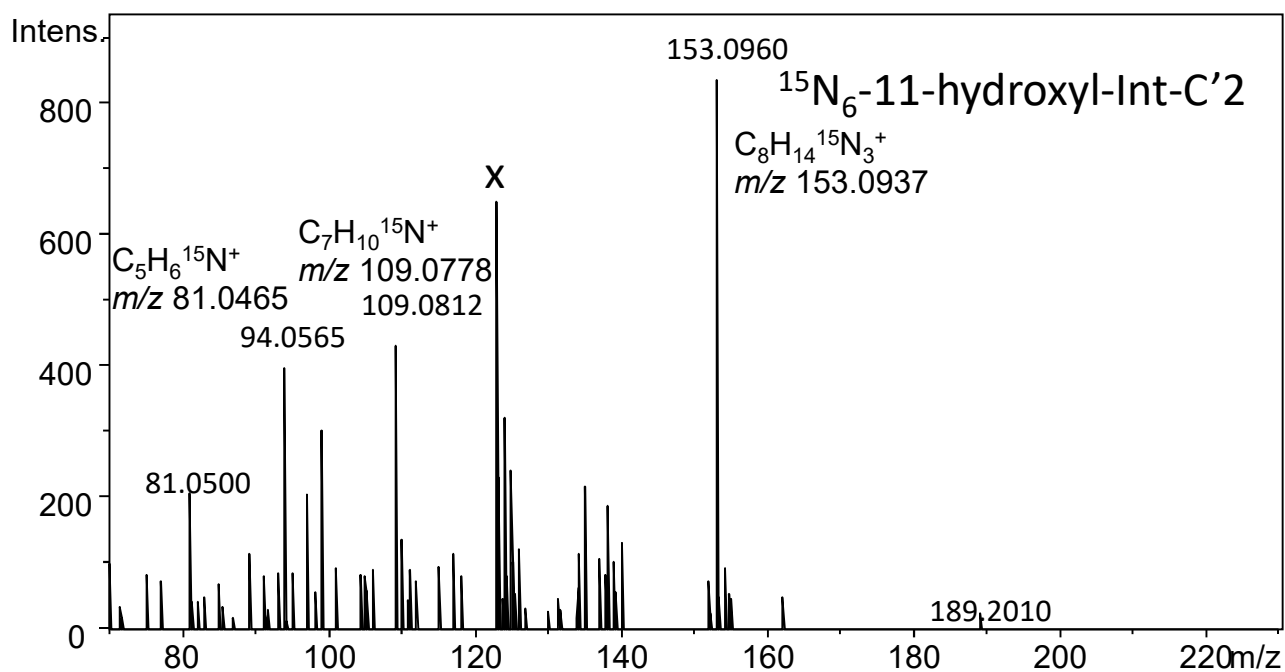

Figure S-7. MS/MS spectra of non-labelled (A) and perfectly labelled (B) 11-hydroxy-Int-C'2

A

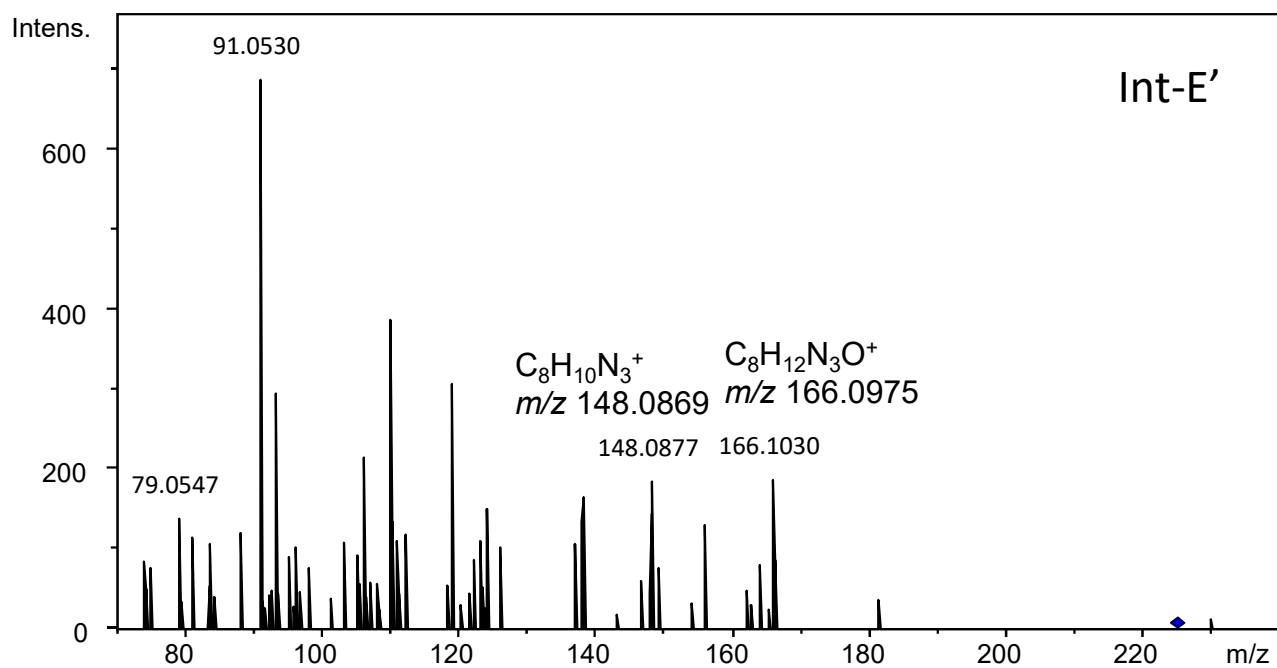

B

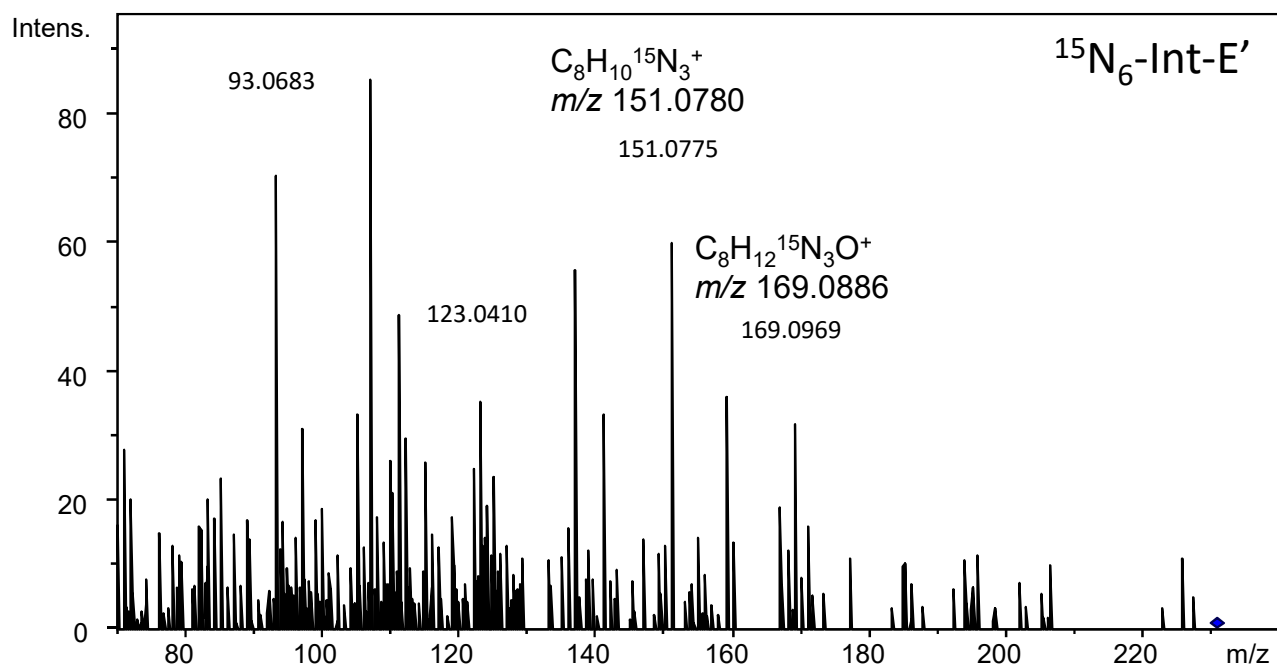

Figure S-8. MS/MS spectra of non-labelled (A) and perfectly labelled (B) Int-E'

A

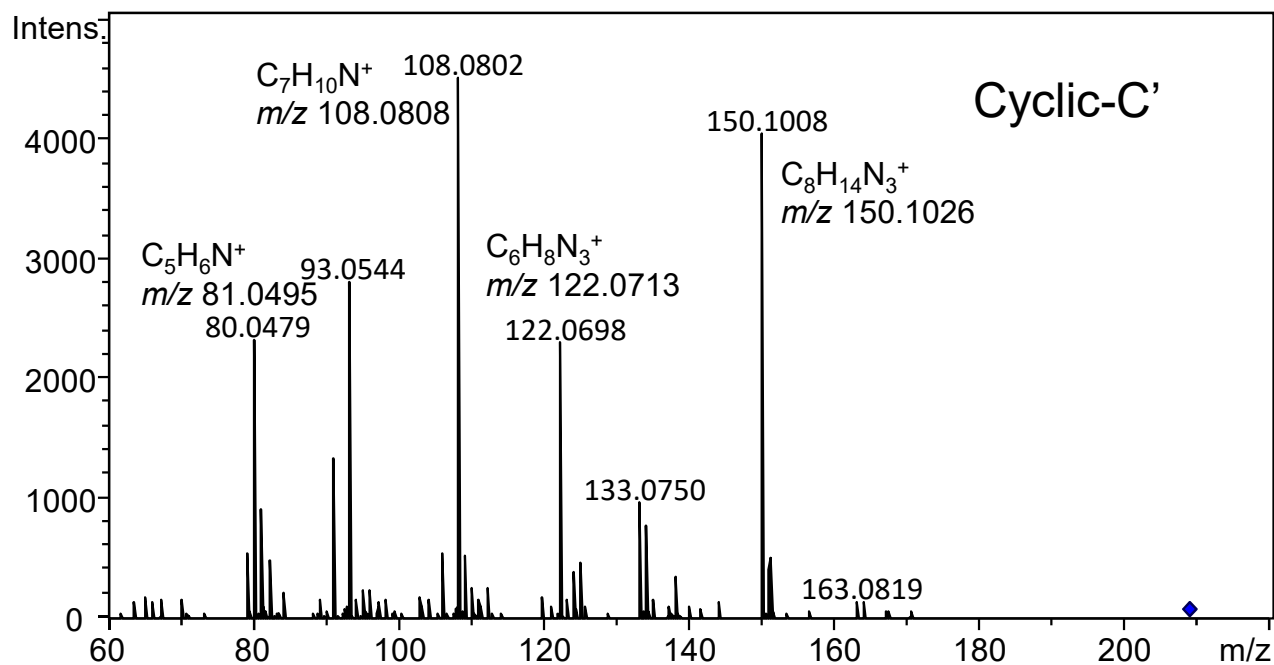

B

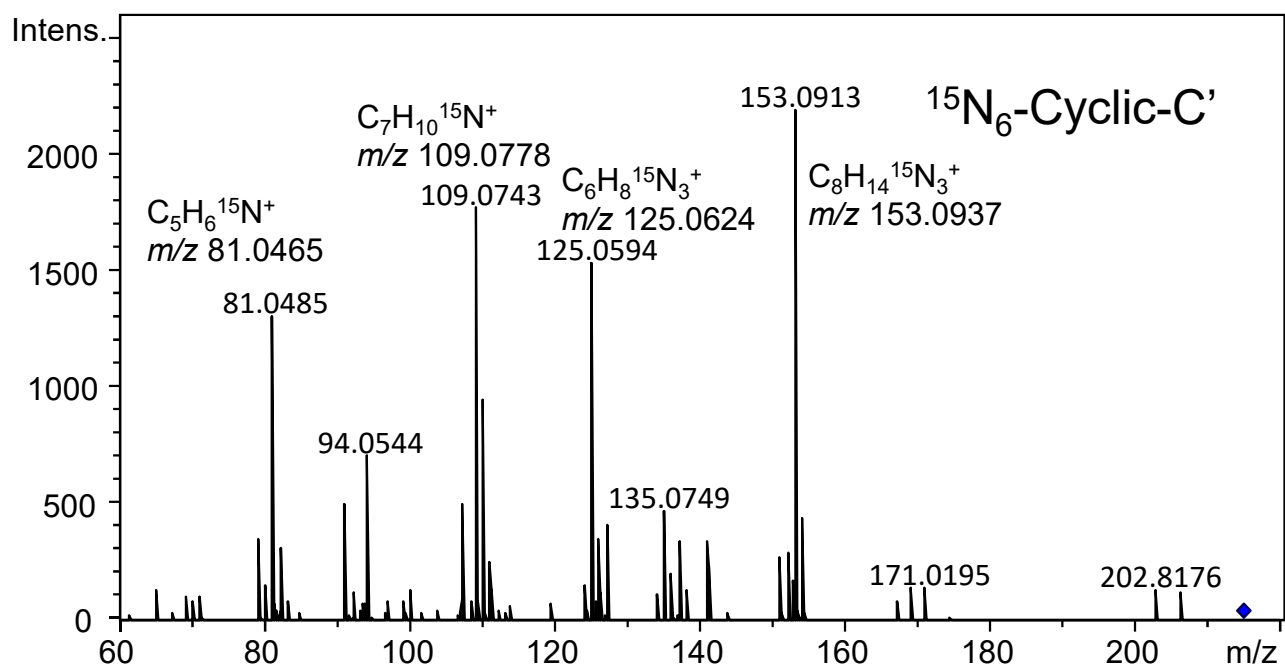

Figure S-9. MS/MS spectra of non-labelled (A) and perfectly labelled (B) Cyclic-C'

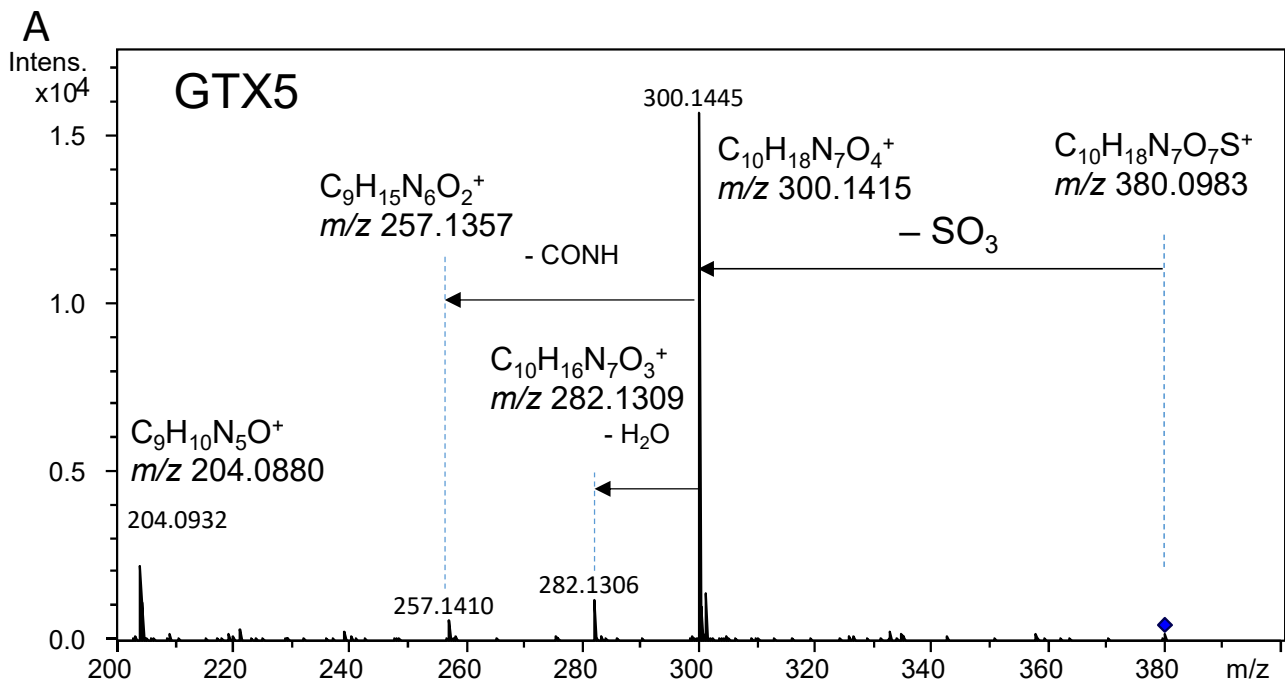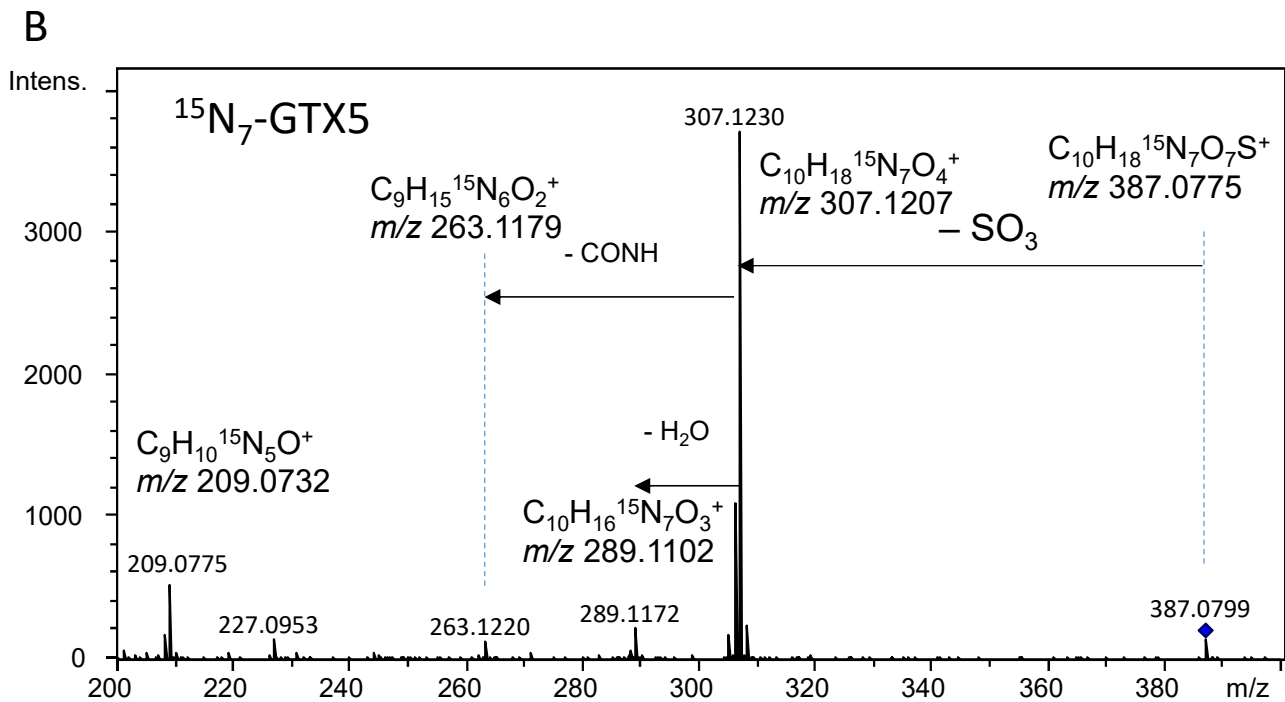

Figure S-10. MS/MS spectra of non-labelled (A) and perfectly labelled (B) GTX5

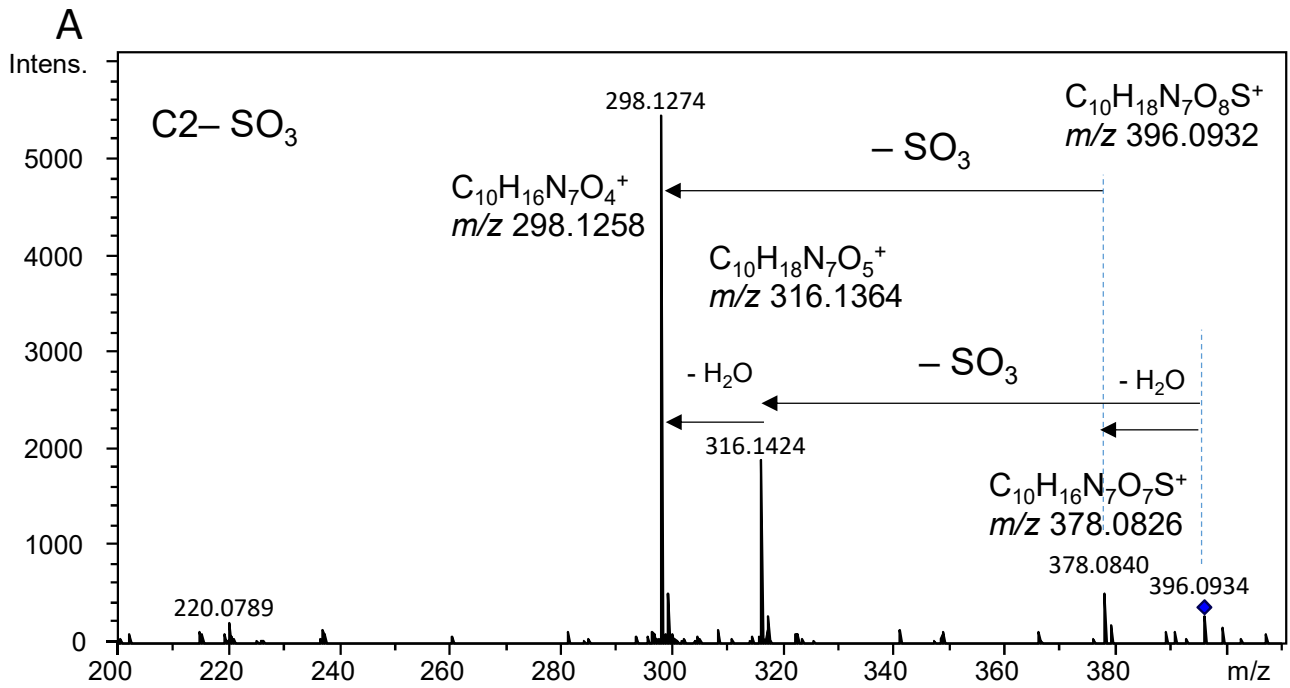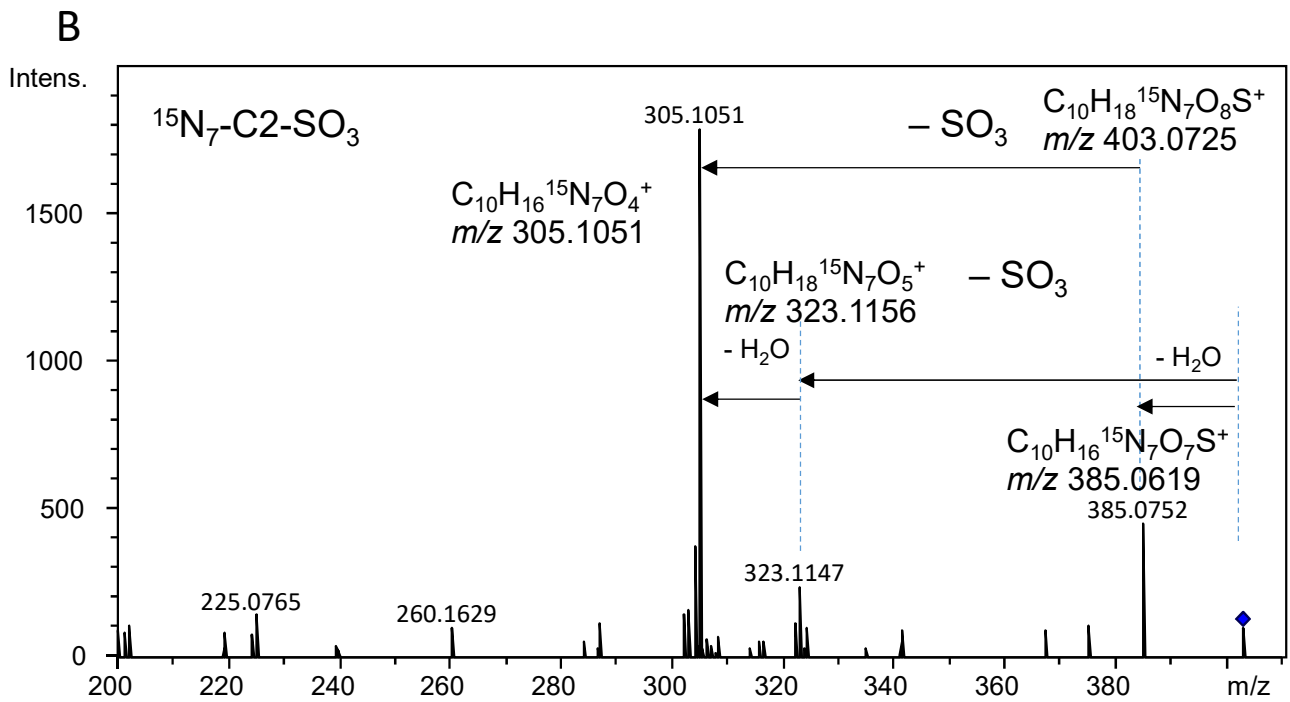

Figure S-11. MS/MS spectra of non-labelled (A) and perfectly labelled (B) C2

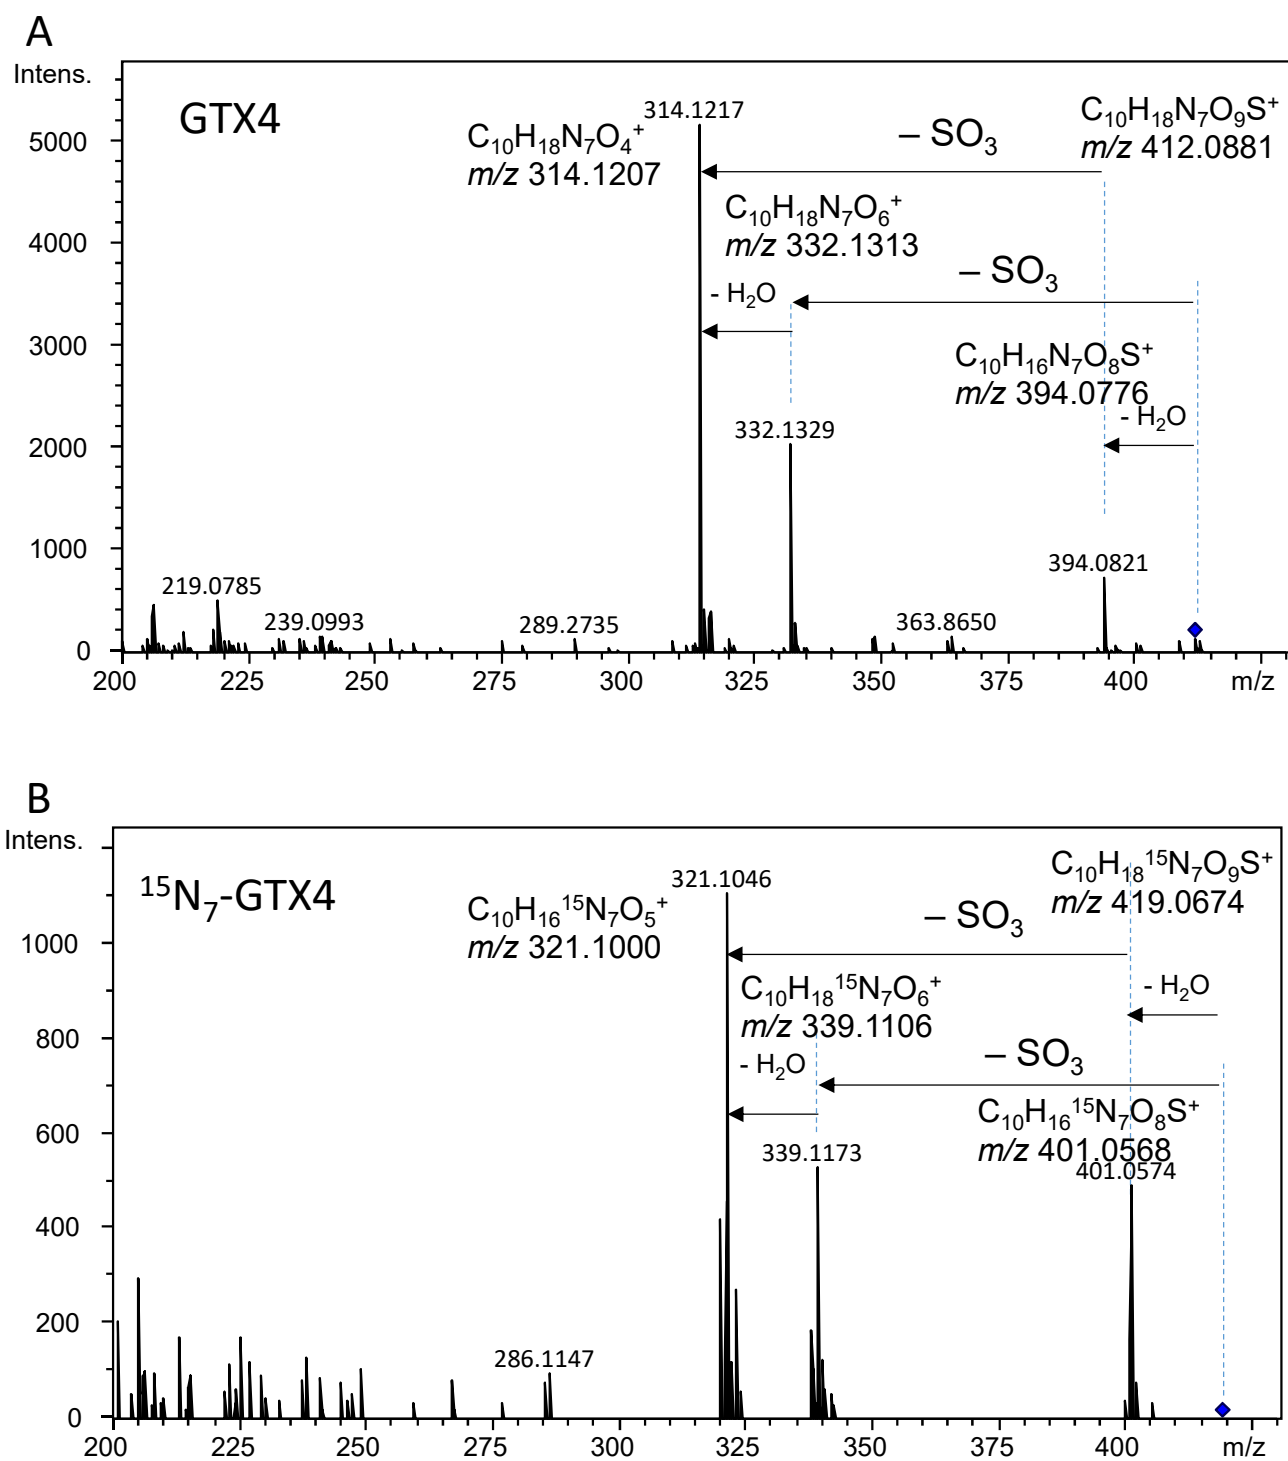

Figure S-12. MS/MS spectra of non-labelled (A) and perfectly labelled (B) GTX4

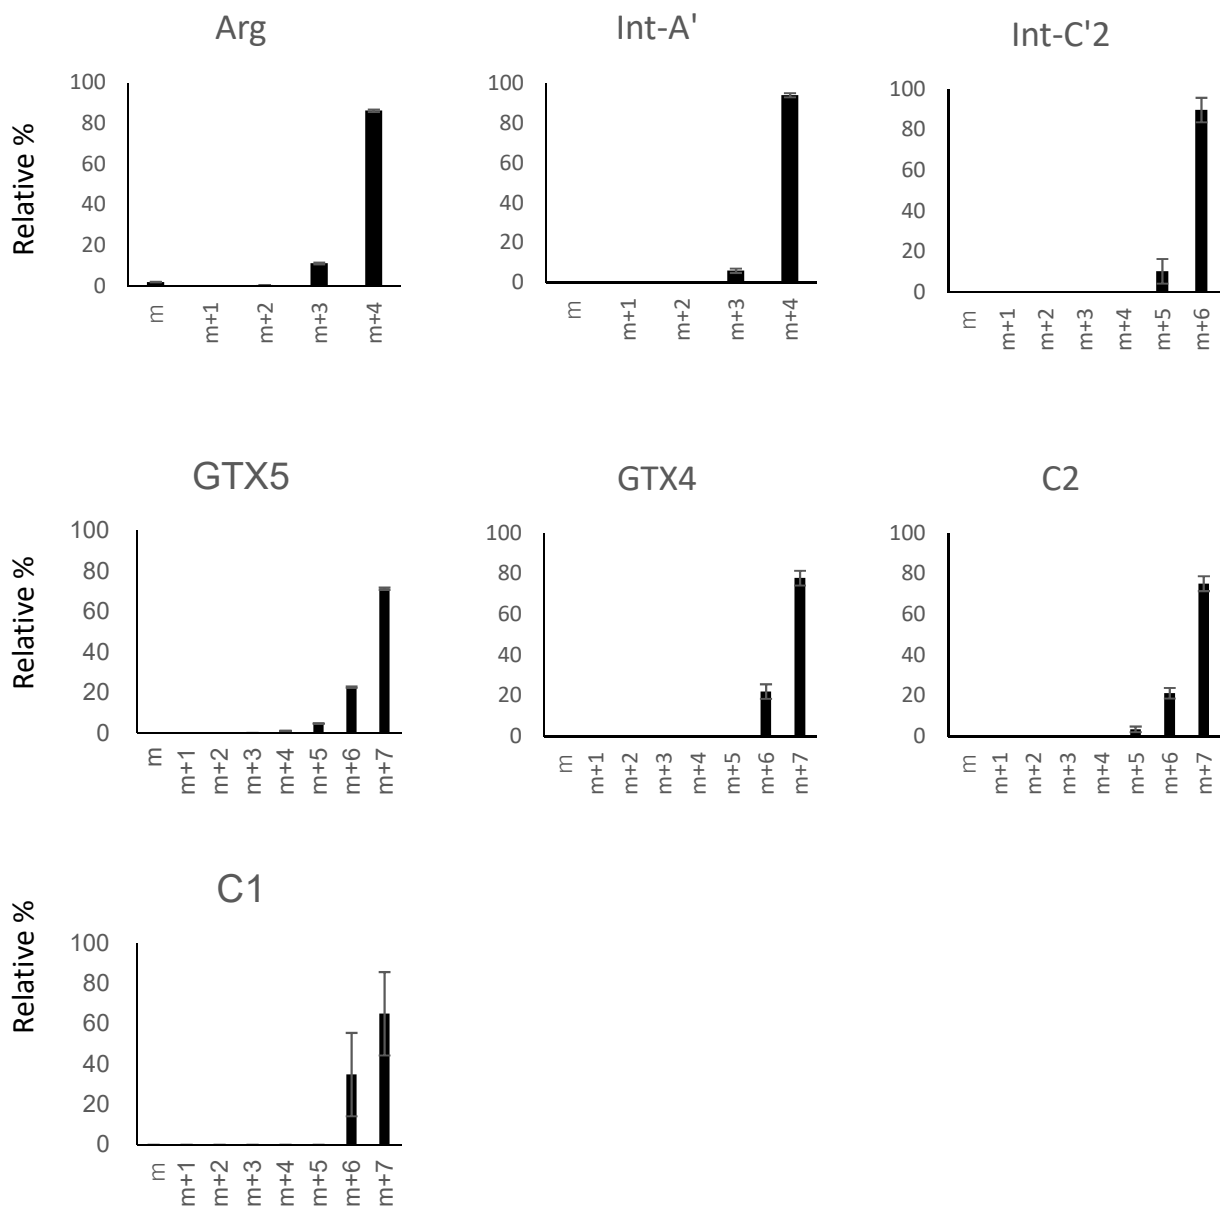

Figure S-13. Relative abundance % of each isotopomer of the biosynthetic intermediates in *A. catenella* after a 2-month passage in  $^{15}\text{N}$ - $\text{NaNO}_3$  medium

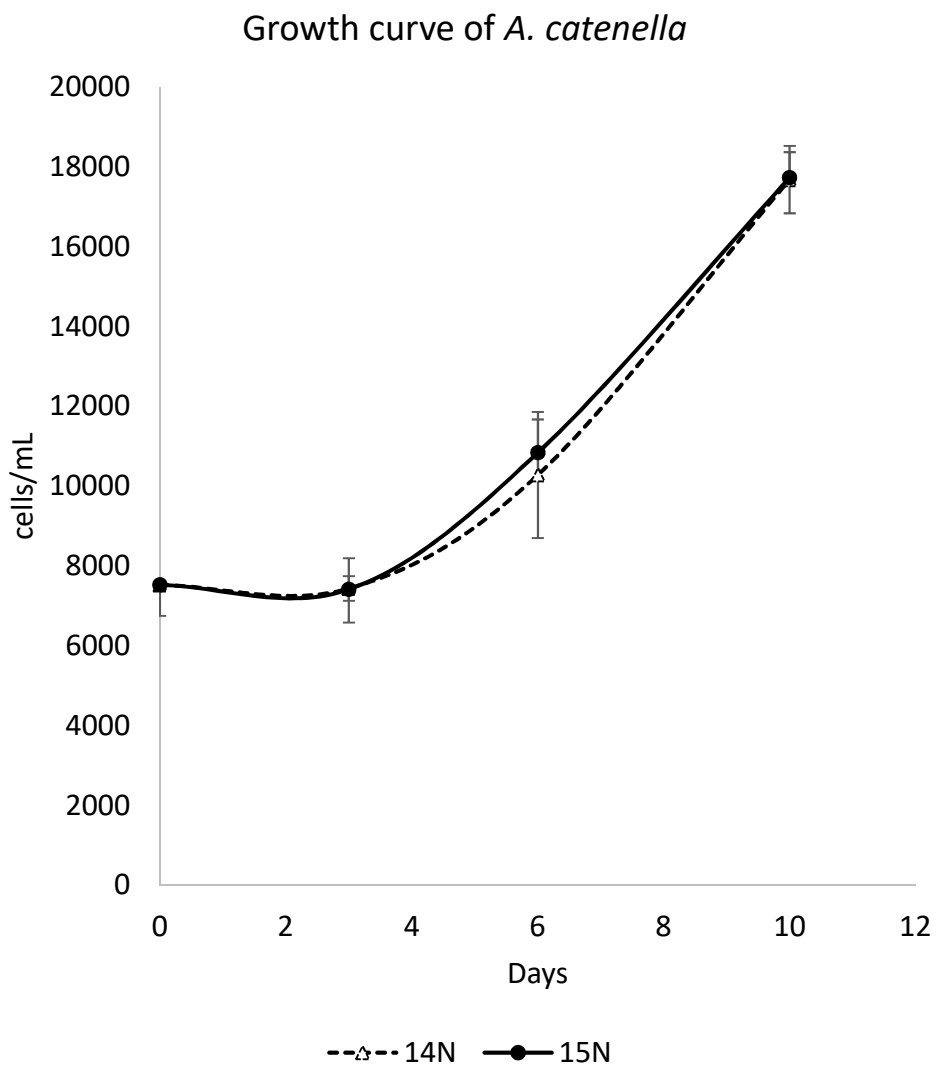

Figure S-14. Growth curve of *A. catenella* cultured with  $^{15}\text{N}\text{-NO}_3$  or  $^{14}\text{N}\text{-NO}_3$



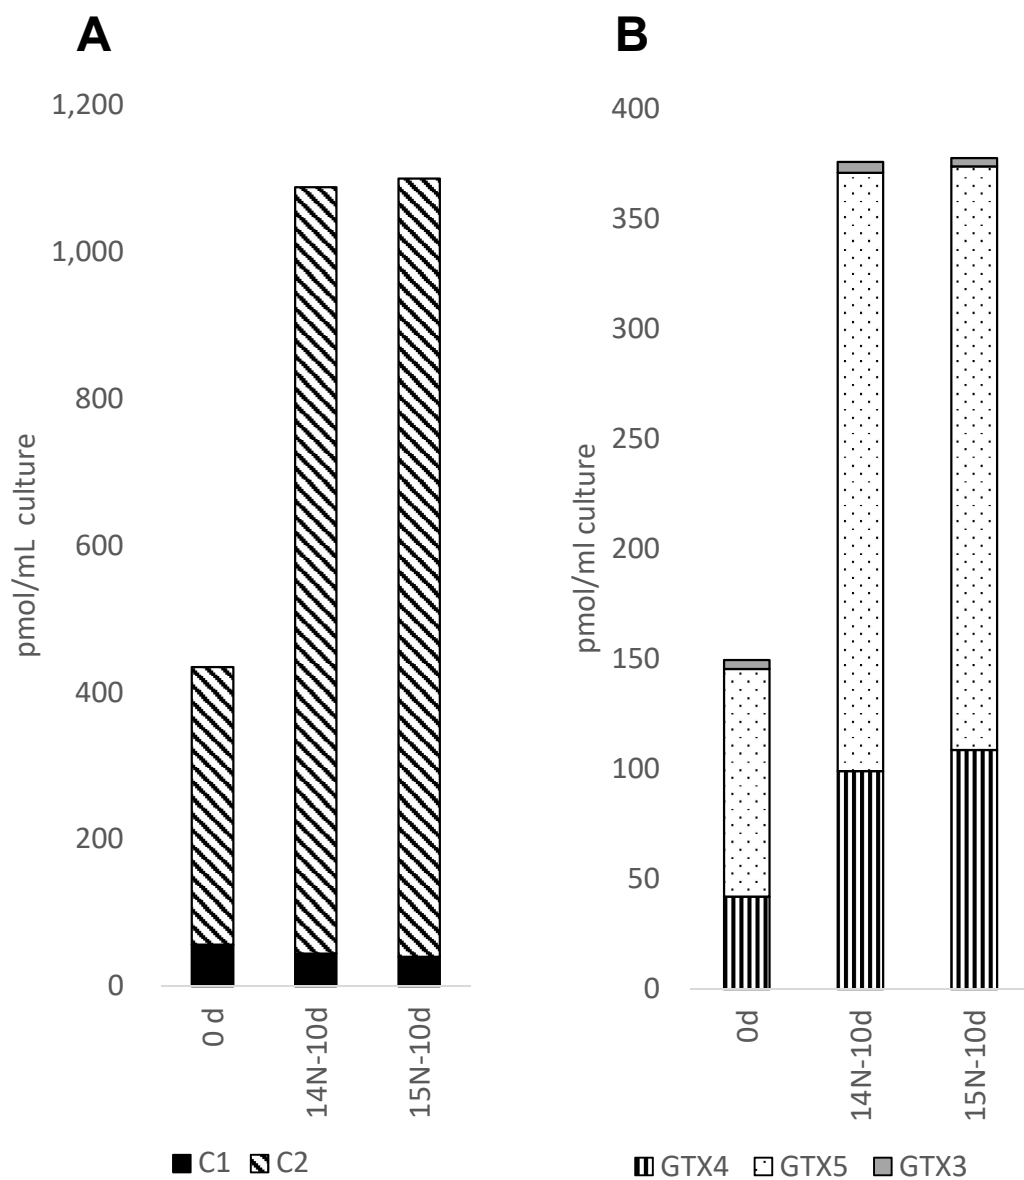

Figure S-15. Day-10 toxin contents of *A. catenella* cultured in  $^{15}\text{N-NaNO}_3$  or  $^{14}\text{N-NO}_3$ . (A) C-toxins, (B) GTXs.

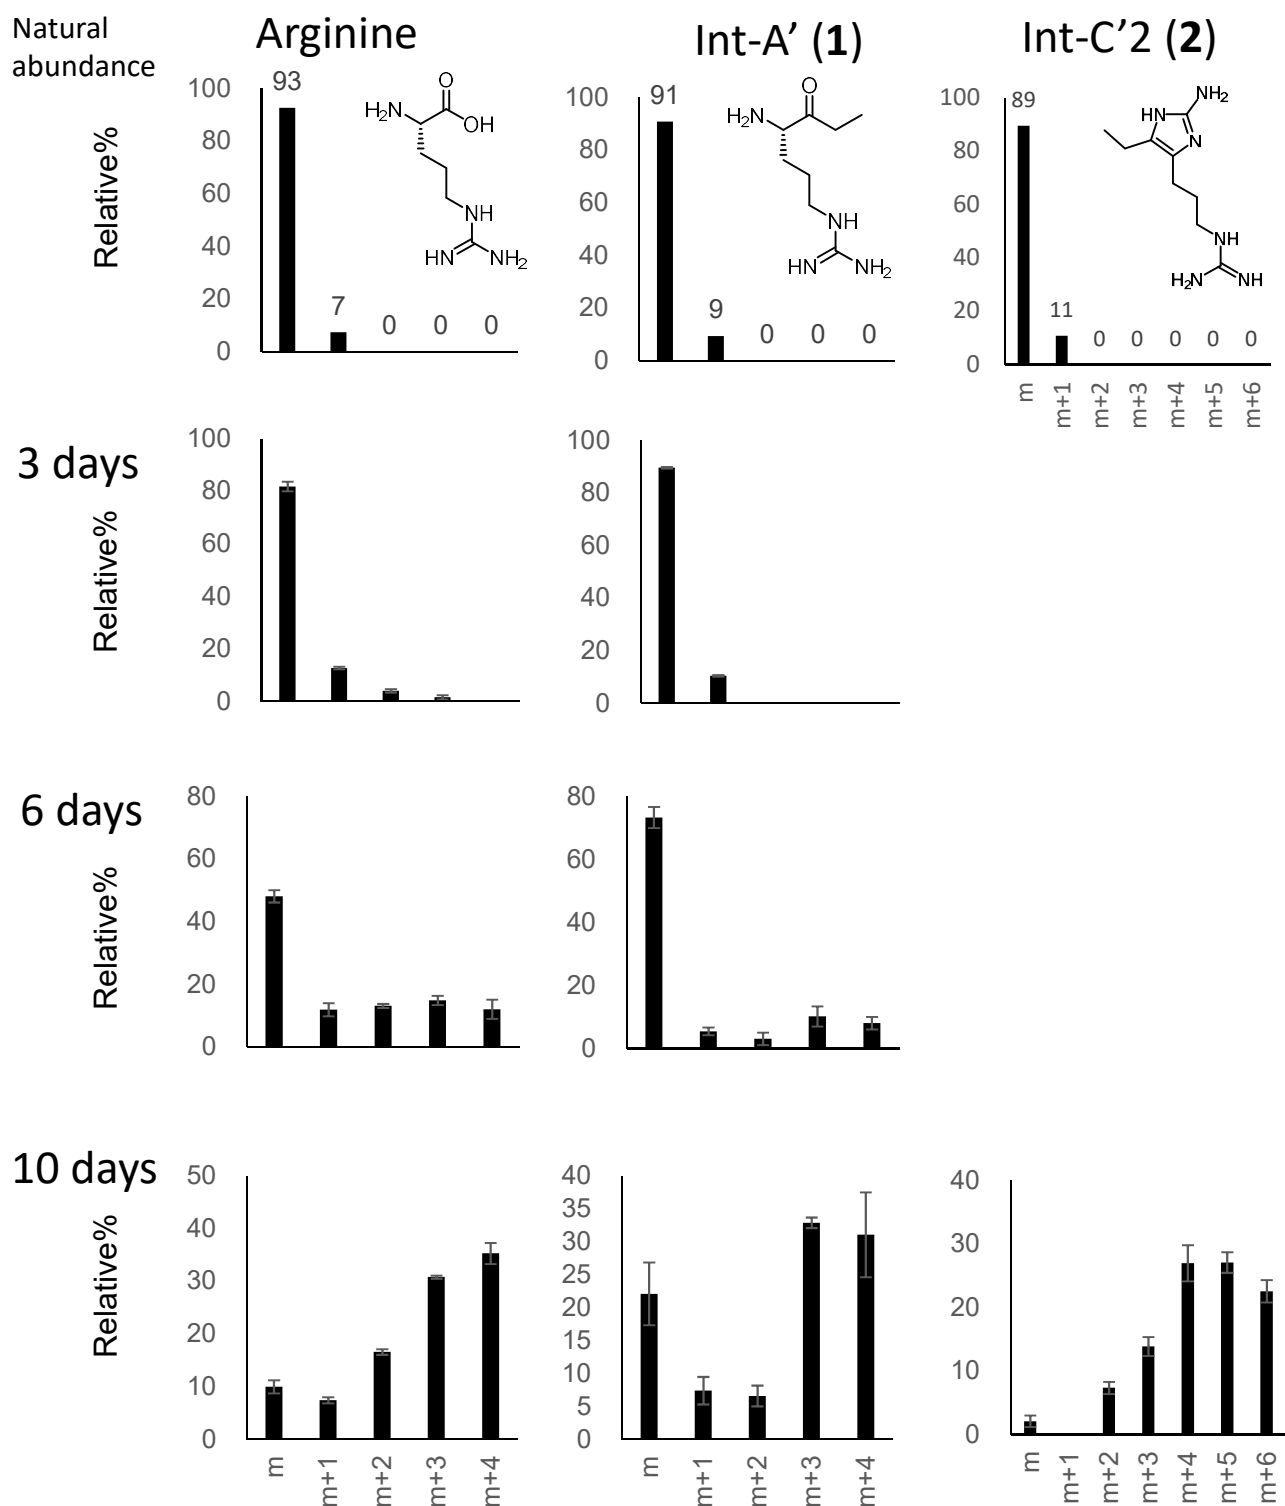

Figure S-16. Relative % of peak area of each isotopomer of the precursor and the biosynthetic intermediates at 3, 6, and 10 days after the addition of  $^{15}\text{N}\text{-NO}_3$  medium to *A. catenella*. Data are presented as mean  $\pm$  SD (n=3).

Natural abundance

11-OH-Int-C'2 (3)

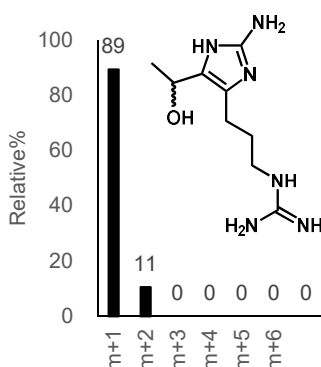

Int-E' (4)

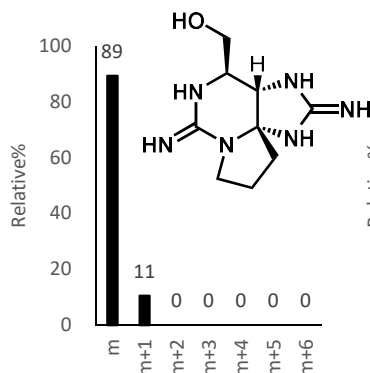

Cyclic-C' (5)

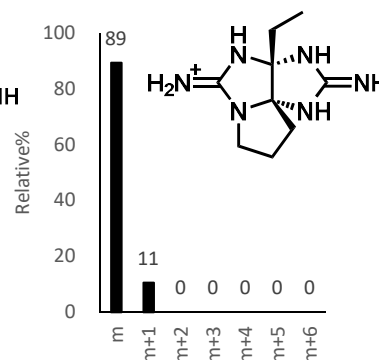

3 days

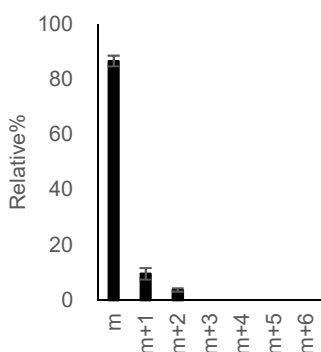

6 days

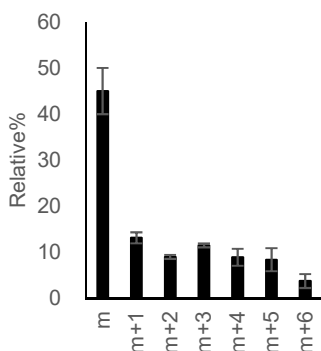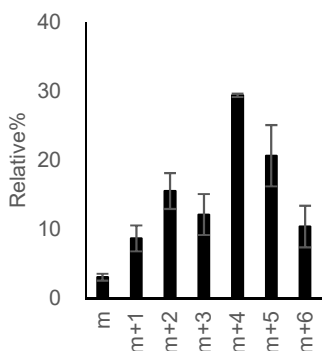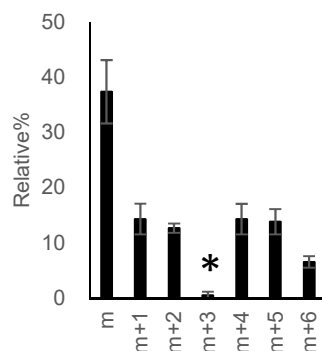

10 days

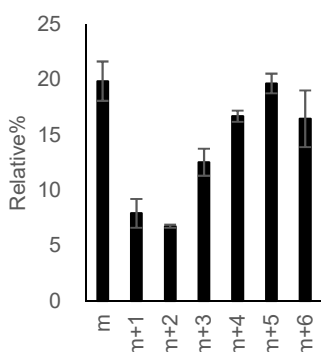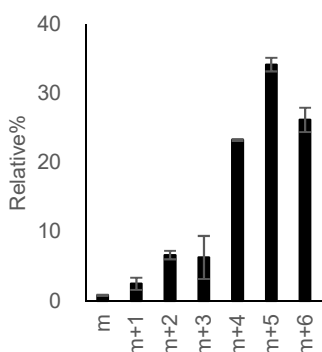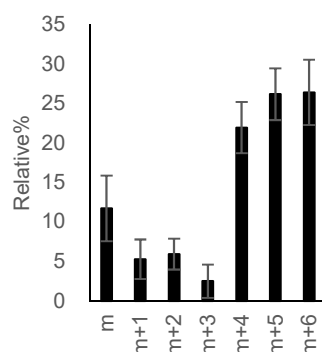

Figure S-17. Relative % of peak area of each isotopomer the biosynthetic intermediates, 11-hydroxyl-Int-C'2 and Int-E' at 3, 6, and 10 days after the addition of  $^{15}\text{N-NO}_3$  medium to *A. catenella*. Data are presented as mean  $\pm$  SD (n=3). \* This isotopomer was suppressed by matrix.

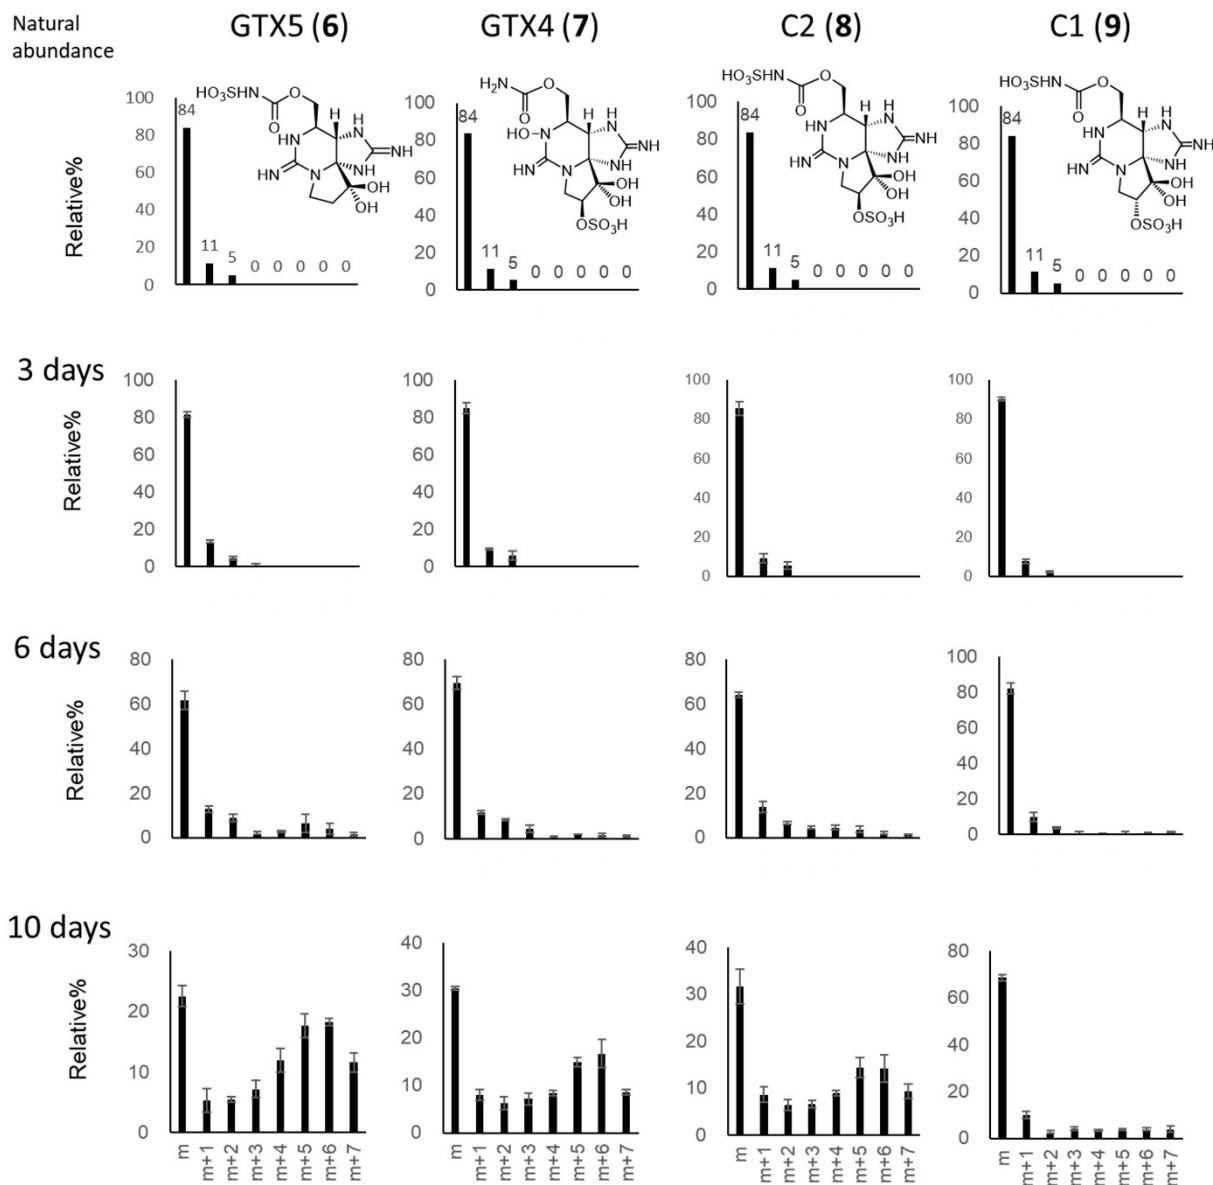

Figure S-18. Relative % of peak of each isotopomer of the STXs at 3, 6, and 10 days after the addition of  $^{15}\text{N-NO}_3$  medium in *A. catenella*. Data are presented as mean  $\pm$  SD (n=3).

## Arginine

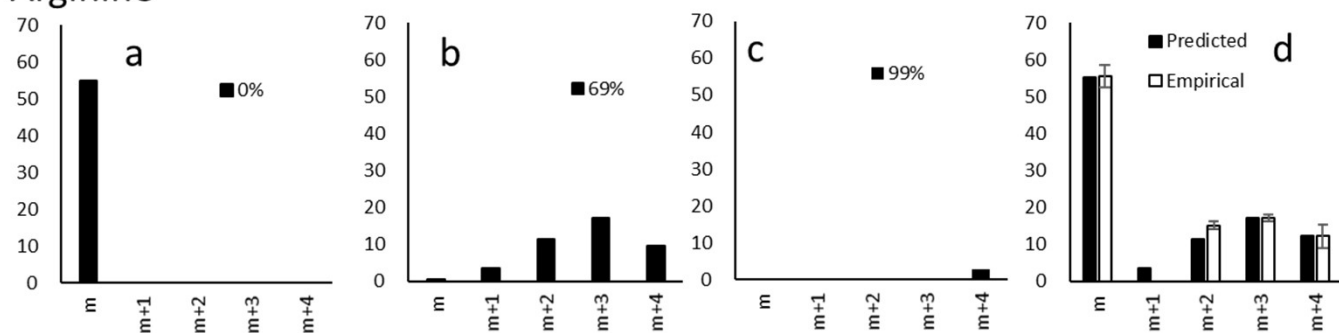

## Int-A'

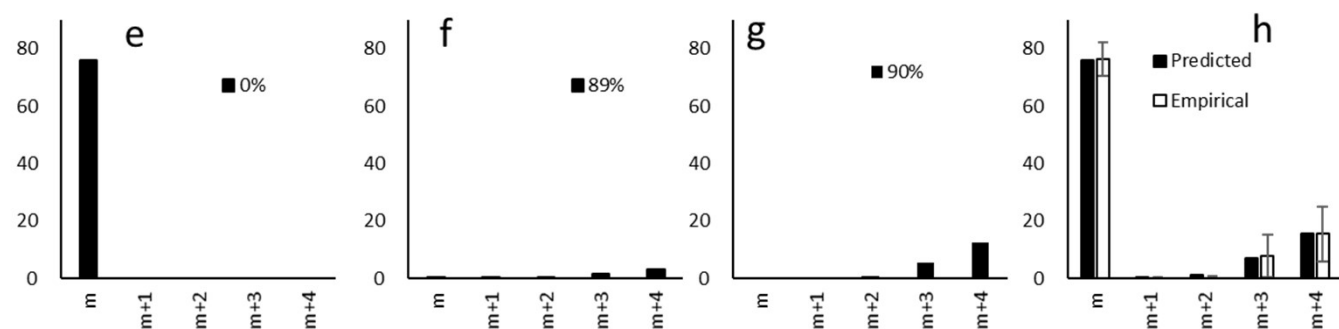

## 11-hydroxyl-Int-C'2

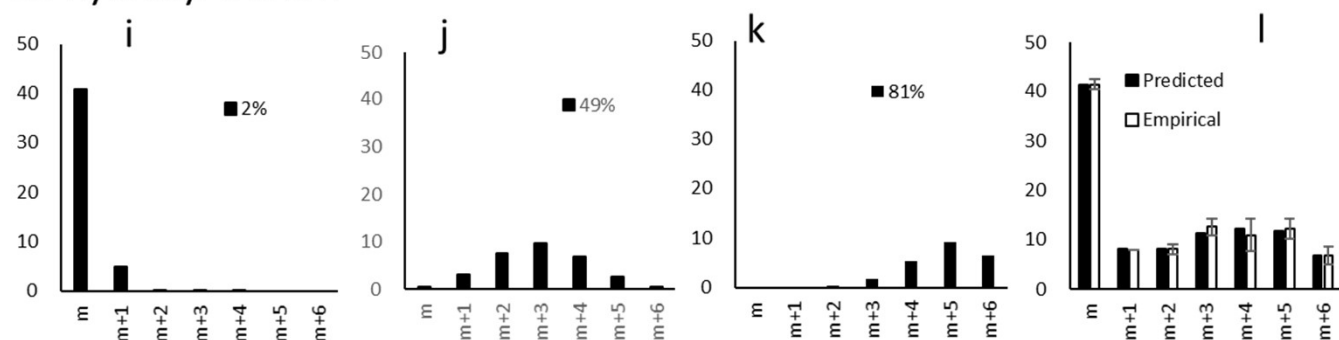

Figure S-19. Three populations stochastically predicted by empirical relative % of each isotopomer on Day 6 Arginine (a, b, c), Int-A' (e, f, g) and 11-hydroxyl-Int-C'2 (i, j, k), hypothesizing the binominal distribution and the merged graph (d, h and l) of predicted data and empirical data

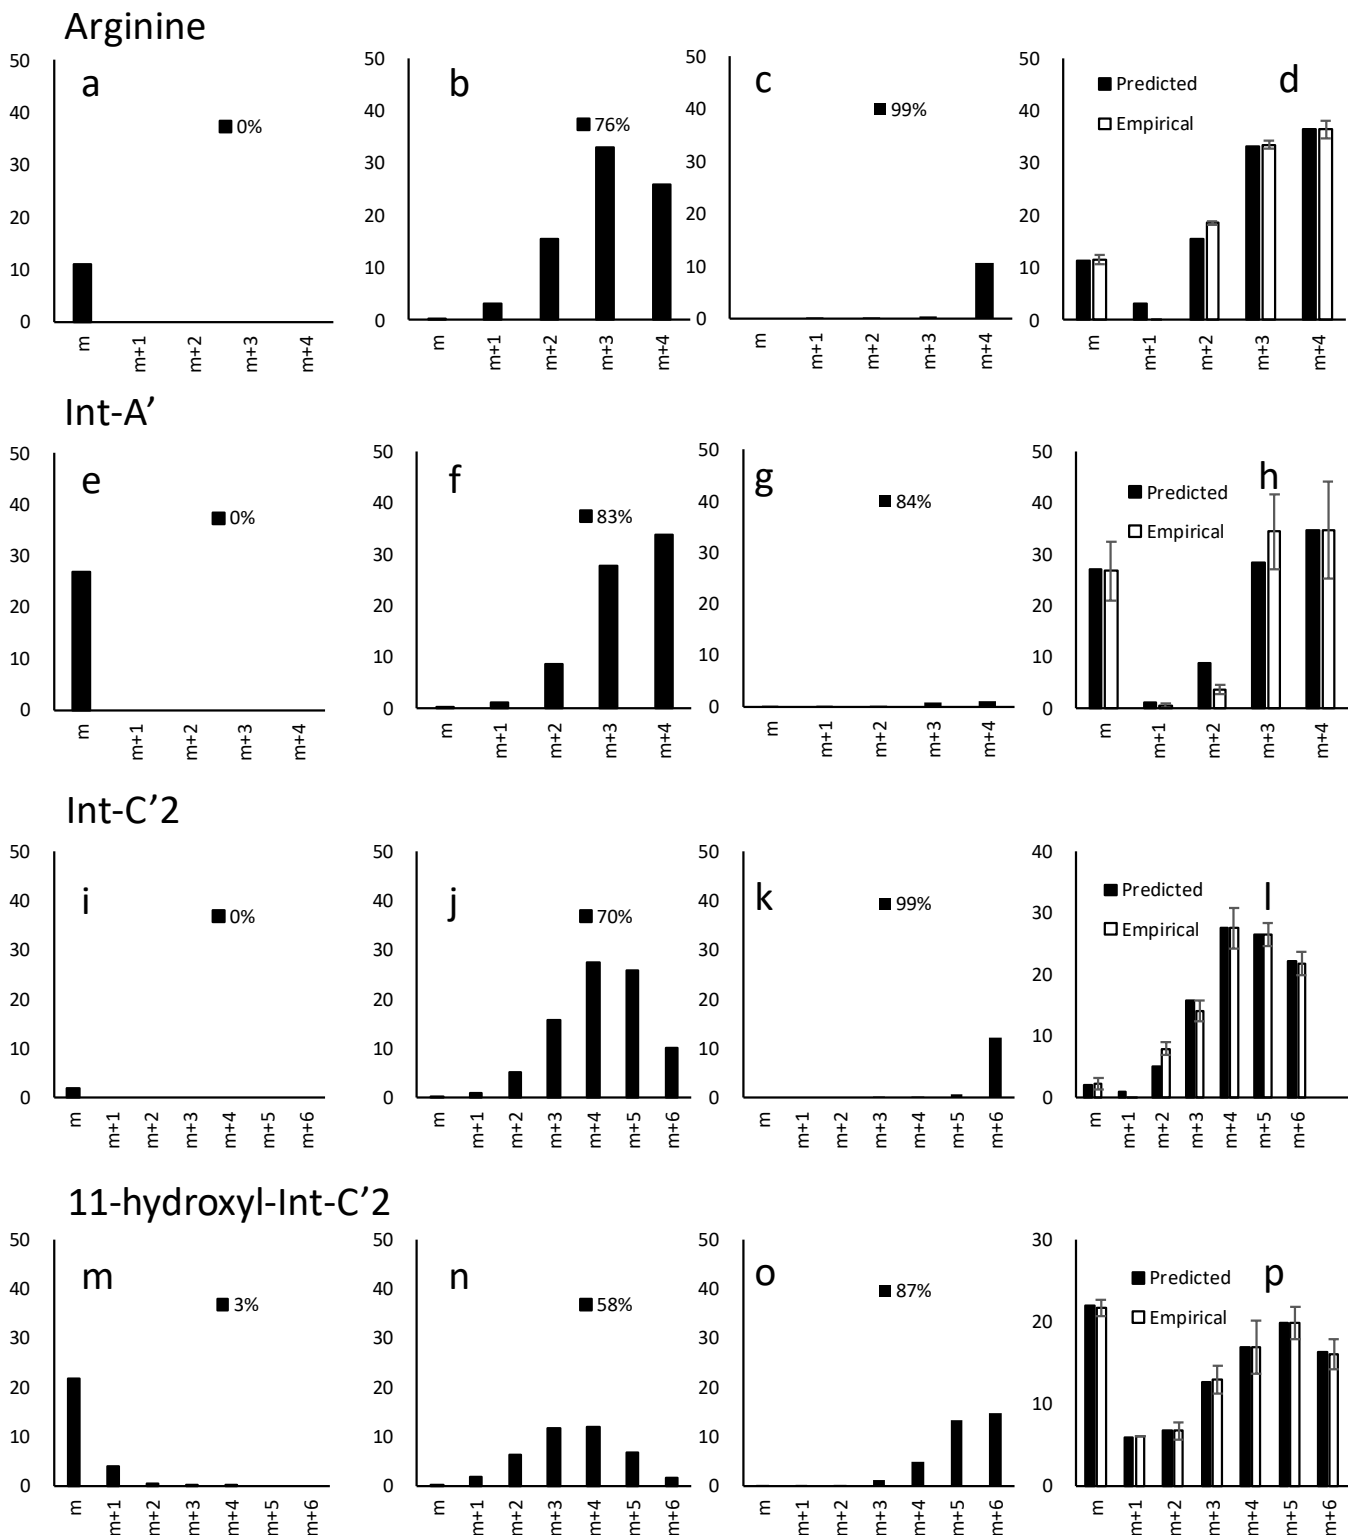

Figure S-20. Three populations stochastically predicted by empirical relative % of each isotopomer on Day 10 Arginine (a, b, c), Int-A' (e, f, g), Int-C'2 (i, j, k) and 11-hydroxyl-Int-C'2 (m, n, o), hypothesizing the binominal distribution and the merged graph (d, h, l and p) of predicted data and empirical data

### Int-E'

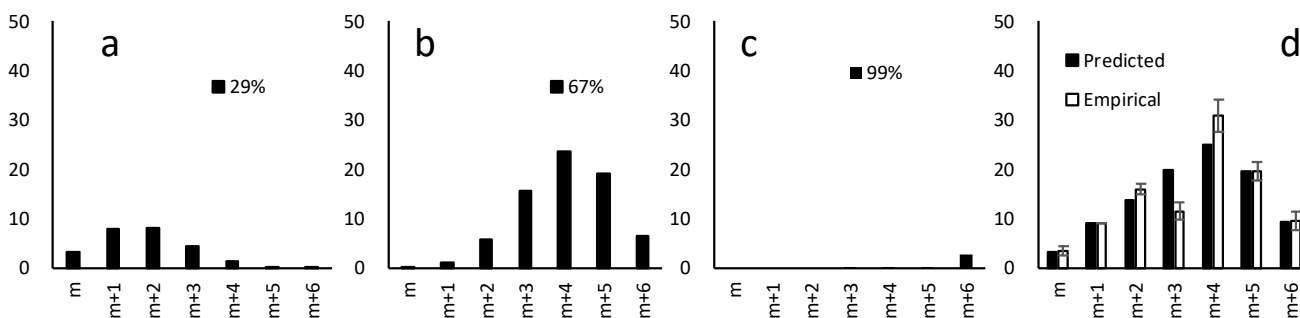

### GTX5

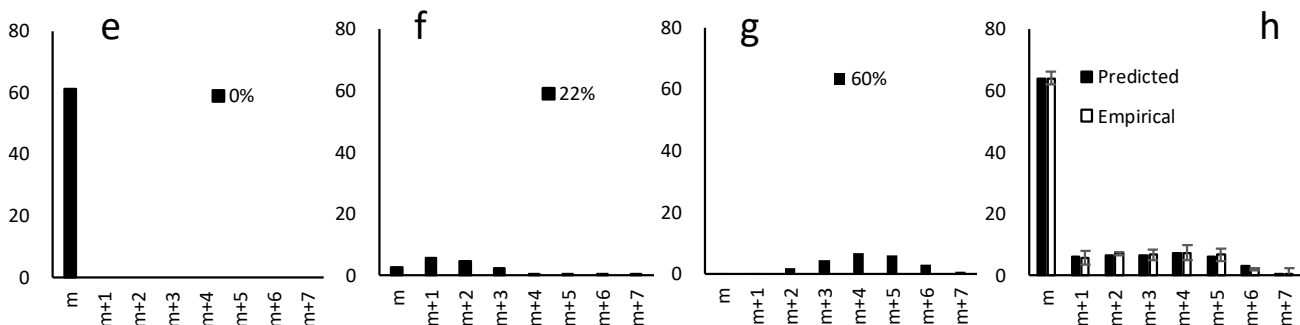

### GTX4

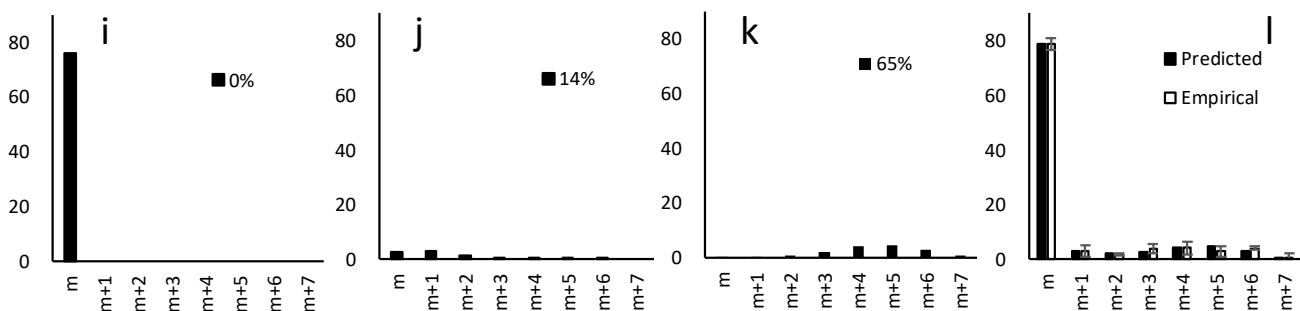

### C2

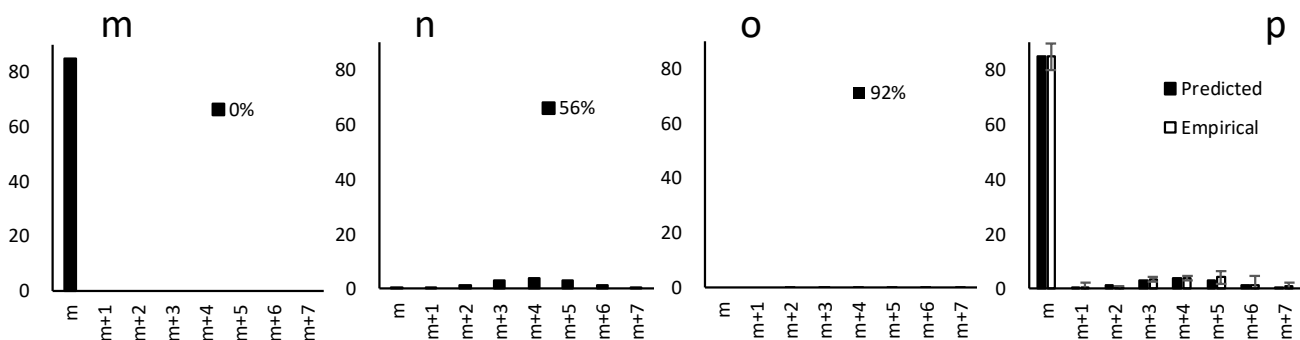

Figure S-21. Three populations stochastically predicted by empirical relative % of each isotopomer on Day 6  
 Int-E' (a, b, c), GTX5(e, f, g), GTX4 (i, j, k) and C2 (m, n, o), hypothesizing the binominal distribution and the merged graph (d, h, l and p) of predicted data and empirical data

### Int-E'

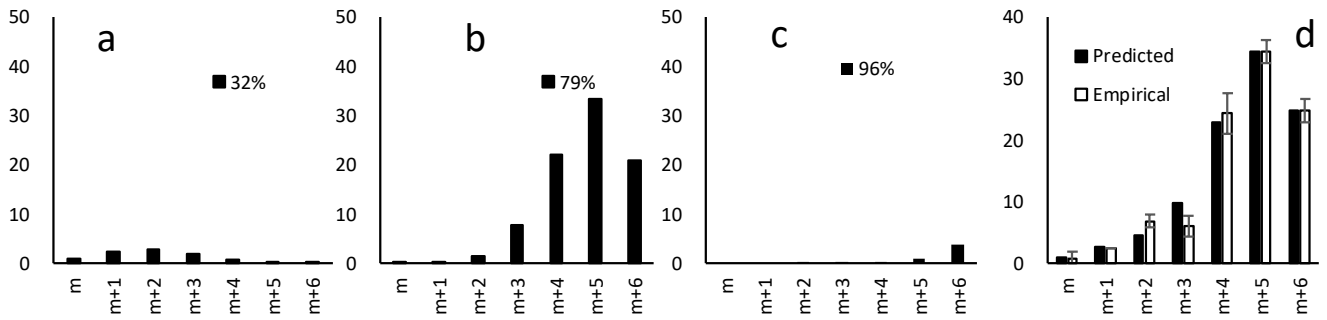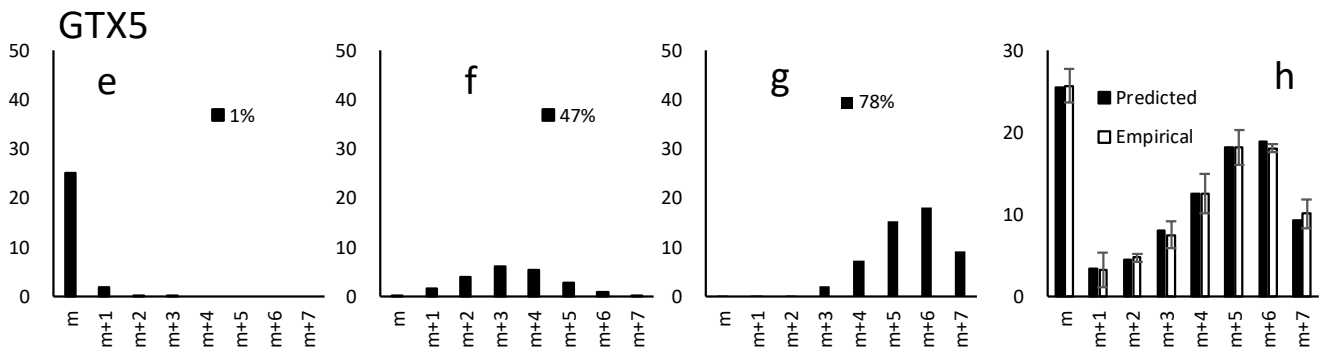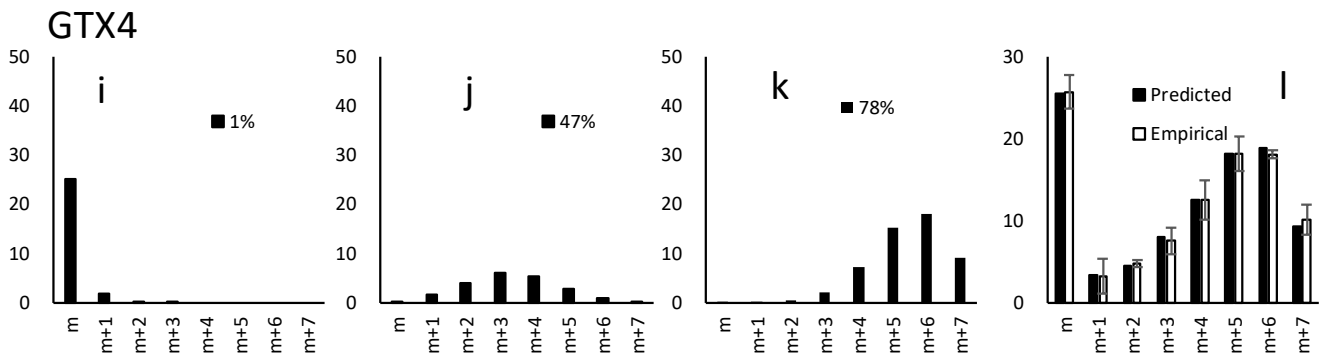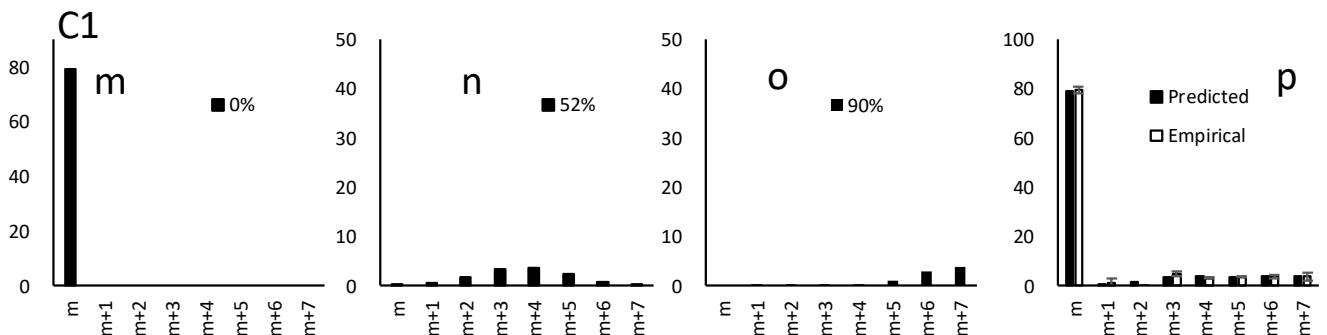

Figure S-22. Three populations stochastically predicted by empirical relative % of each isotopomer on Day 10 Int-E' (a, b, c), GTX5(e, f, g), GTX4 (i, j, k) and C1 (m, n, o), hypothesizing the binominal distribution and the merged graph (d, h, l and p) of predicted data and empirical data



Period 1

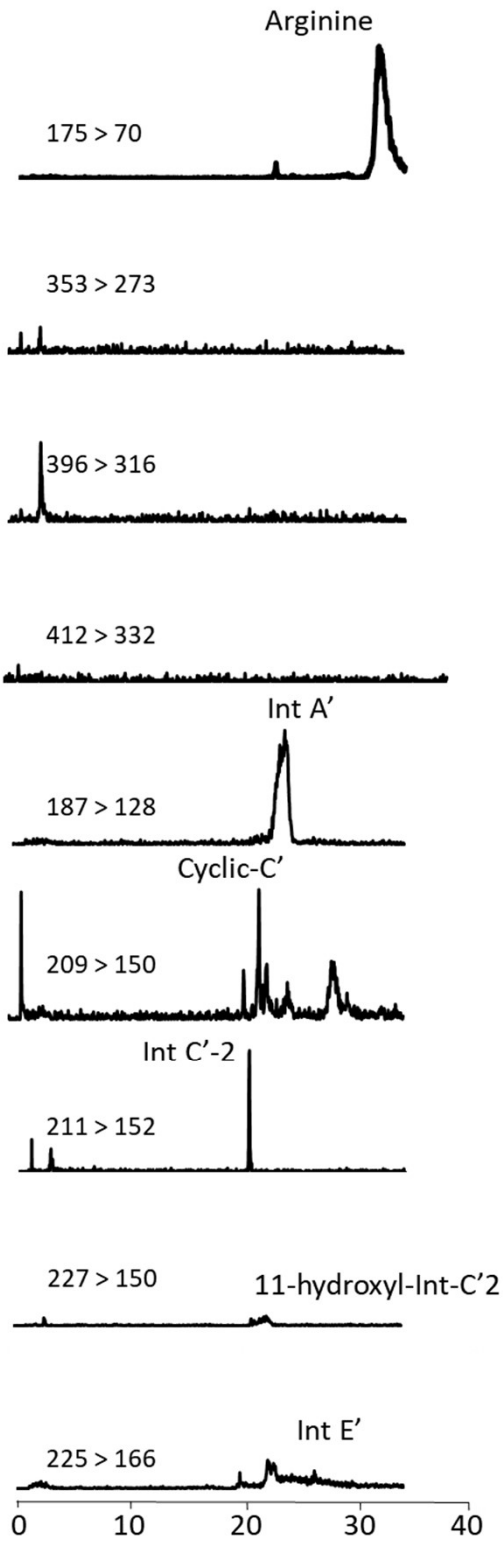

Period 2

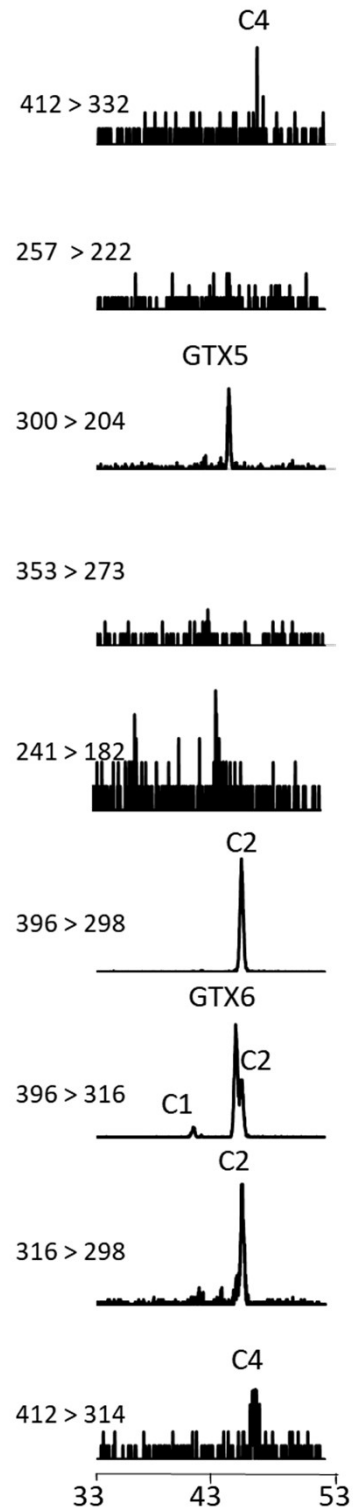

Figure S-23. HILIC-MS-MRM chromatogram of toxic *G. catenatum* extract

Period 1

Period 2

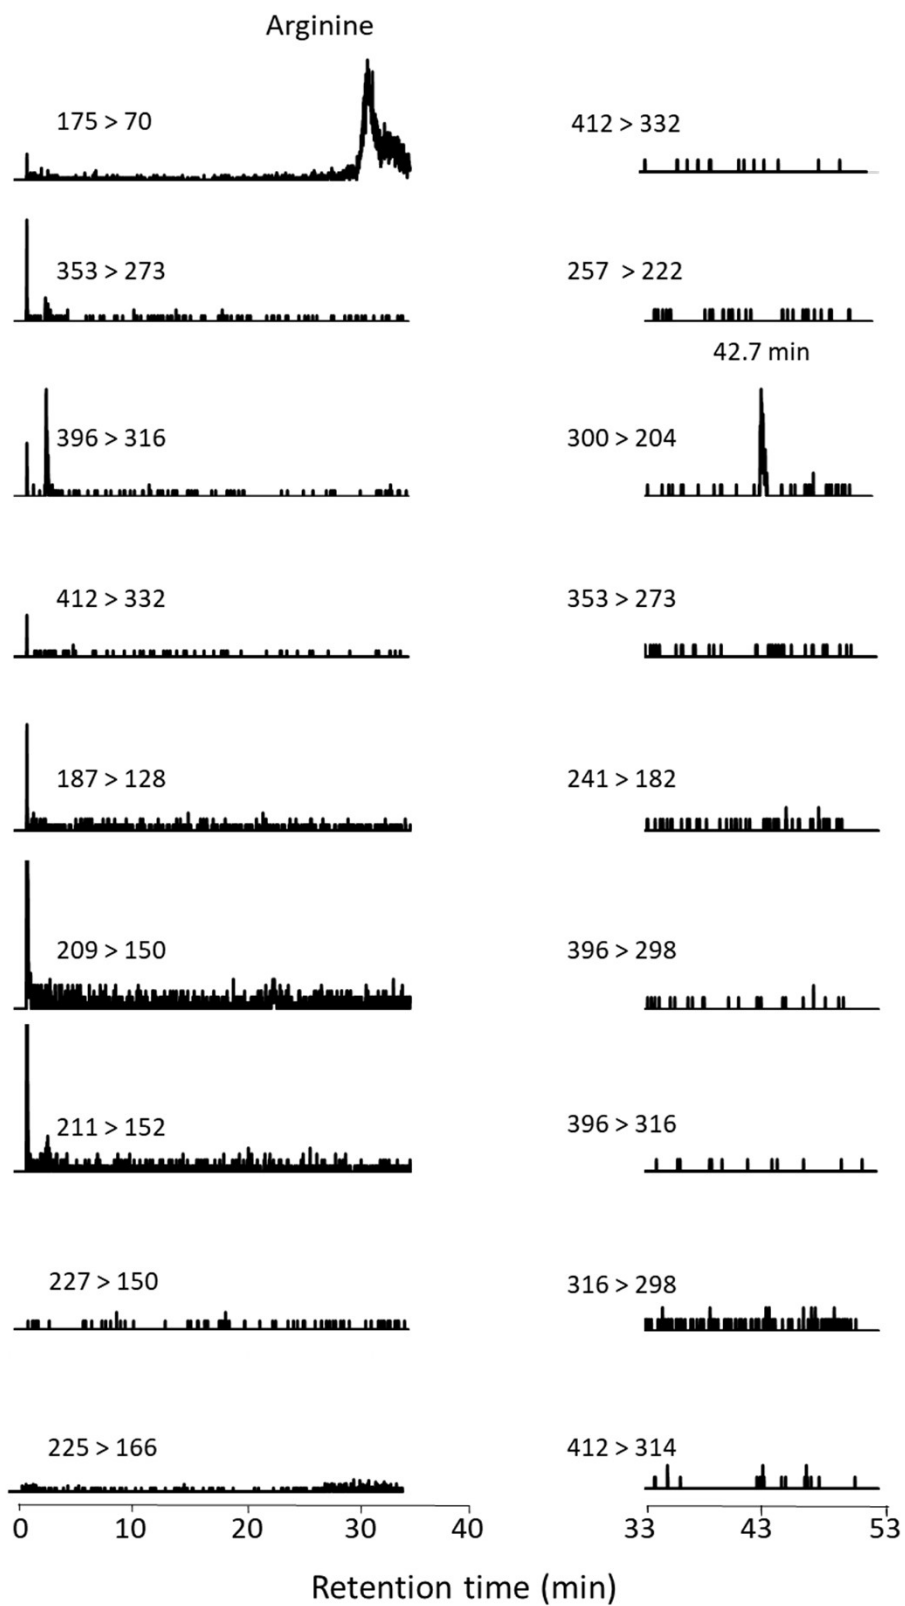

Figure S-24. HILIC-MS-MRM chromatogram of non-toxic *A. insuetum* extract

Table S-1.

The theoretical values for the isotopomers with different numbers of  $^{15}\text{N}$

| Number of $^{15}\text{N}$ | 0        | 1        | 2        | 3        | 4        | 5        | 6        | 7        |
|---------------------------|----------|----------|----------|----------|----------|----------|----------|----------|
| Arginine                  | 175.1190 | 176.1160 | 177.1130 | 178.1101 | 179.1071 |          |          |          |
| Int-A'                    | 187.1553 | 188.1524 | 189.1494 | 190.1464 | 191.1435 |          |          |          |
| Int-C'2                   | 211.1666 | 212.1636 | 213.1606 | 214.1577 | 215.1547 | 216.1517 | 217.1488 |          |
| 11-hydroxy-Int-C'2        | 227.1615 | 228.1585 | 229.1556 | 230.1526 | 231.1496 | 232.1467 | 233.1437 |          |
| Int-E'                    | 225.1458 | 226.1429 | 227.1399 | 228.1369 | 229.1340 | 230.1310 | 231.1280 |          |
| Cyclic-C'                 | 209.1509 | 210.1480 | 211.1450 | 212.1420 | 213.1391 | 214.1361 | 215.1331 |          |
| C2-SO <sub>3</sub>        | 396.0932 | 397.0902 | 398.0873 | 399.0843 | 400.0813 | 401.0784 | 402.0754 | 403.0725 |
| GTX5                      | 380.0983 | 381.0953 | 382.0924 | 383.0894 | 384.0864 | 385.0835 | 386.0851 | 387.0775 |
| GTX4                      | 412.0881 | 413.0852 | 414.0822 | 415.0792 | 416.0763 | 417.0733 | 418.0703 | 419.0674 |

C1 was analyzed by the same theoretical values as for C2.

Table S-2. Clean up conditions employed for Chromabond<sup>R</sup> HILIC and the resulting recovered compounds

| Entry # | Conditioning                                              | Washing                                                                            | Elution                                                   | Recovered compounds                                  |
|---------|-----------------------------------------------------------|------------------------------------------------------------------------------------|-----------------------------------------------------------|------------------------------------------------------|
| 1       | CH <sub>3</sub> CN-H <sub>2</sub> O with 0.1% HCOOH = 8:2 | CH <sub>3</sub> CN-H <sub>2</sub> O with 0.1% HCOOH = 8:2                          | CH <sub>3</sub> CN-H <sub>2</sub> O with 0.1% HCOOH = 1:9 | GTX1-5, STXs, C1, C2                                 |
| 2       | THF                                                       | THF                                                                                | 0.5 M AcOH or 0.2M HCOOH                                  | Arg, Int-A', IntC'2, Cyclic-C', GTX1-3, GTX5, STXs   |
| 3       | THF                                                       | THF, CH <sub>3</sub> CN, CH <sub>3</sub> CN-H <sub>2</sub> O with 0.1% HCOOH = 9:1 | 0.2 M HCOOH                                               | Arg, Int-A', IntC'2, Cyclic-C', GTX1-5, STXs, C1, C2 |

Table S-3. Example of calculation of peak areas removing the contribution of the naturally occurring stable isotope

Peak area of each isotopomer of C2

| m/z                                                                            | 396   | 397   | 398  | 399  | 400  | 401   | 402   | 403   |
|--------------------------------------------------------------------------------|-------|-------|------|------|------|-------|-------|-------|
| Absolute peak area of C2                                                       | 57129 | 10746 | 4704 | 9902 | 7942 | 25581 | 13239 | 12015 |
| theoretical peak area (none of labelled 15N was introduced)                    | 57129 | 7655  | 3485 | 0    | 0    |       |       |       |
| expected peak area after subtraction of nonlabelled C2                         | 0     | 3091  | 1219 | 9902 | 7942 |       |       |       |
| theoretical peak area C2 involving one unit of labelled 15N                    |       | 3091  | 433  | 189  | 0    | 0     |       |       |
| expected peak area after subtraction of C2 which involves 0 and 1 labelled 15N |       | 0     | 786  | 9714 | 7942 | 25581 |       |       |
| theoretical peak area C2 involving 2 unit of labelled 15N                      |       |       | 786  | 99   | 48   | 0     | 0     |       |
| expected peak area after subtraction of C2 which involves 0-2 labelled 15N     |       |       | 0    | 9615 | 7894 | 25581 | 13239 |       |
| theoretical peak area C2 involving 3 unit of labelled 15N                      |       |       |      | 9615 | 1183 | 587   | 0     | 0     |
| expected peak area after subtraction of C2 which involves 0-3 labelled 15N     |       |       |      | 0    | 6712 | 24994 | 13239 | 0     |
| theoretical peak area C2 involving 4 unit of labelled 15N                      |       |       |      |      | 6712 | 799   | 49    | 0     |
| expected peak area after subtraction of C2 which involves 0-4 labelled 15N     |       |       |      |      | 0    | 24196 | 13190 | 12015 |
| theoretical peak area C2 involving 5 unit of labelled 15N                      |       |       |      |      |      | 24196 | 2613  | 1476  |
| expected peak area after subtraction of C2 which involves 0-5 labelled 15N     |       |       |      |      |      | 0     | 10577 | 10539 |
| theoretical peak area C2 involving 6 unit of labelled 15N                      |       |       |      |      |      |       | 10577 | 1142  |
| expected peak area after subtraction of C2 which involves 0-6 labelled 15N     |       |       |      |      |      |       | 0     | 9397  |
| theoretical peak area C2 involving 7 unit of labelled 15N                      |       |       |      |      |      |       |       | 9397  |
| Natural Abundance (%)                                                          | M     | M+1   | M+2  | M+3  | M+4  | M+5   | M+6   | M+7   |
| non-labelled                                                                   | 100   | 13.4  | 6.1  |      |      |       |       |       |
| 15N                                                                            |       | 100   | 14   | 6.1  |      |       |       |       |
| 15N2                                                                           |       |       | 100  | 12.6 | 6.1  |       |       |       |
| 15N3                                                                           |       |       |      | 100  | 12.3 | 6.1   |       |       |
| 15N4                                                                           |       |       |      |      | 100  | 11.9  | 6.1   |       |
| 15N5                                                                           |       |       |      |      |      | 100   | 10.8  | 6.1   |
| 15N6                                                                           |       |       |      |      |      |       | 100   | 10.8  |
| 15N7                                                                           |       |       |      |      |      |       |       | 100   |
| number of incorporated 15N                                                     | 0     | 1     | 2    | 3    | 4    | 5     | 6     | 7     |
| Peak areas after removing those of the naturally occurring stable isotope      | 57129 | 3091  | 786  | 9615 | 6712 | 24196 | 10577 | 9397  |

Table S-4. Production rate (nM/d)

| Day | Arginine | Int-A' | Int-C'2 | Cyclic-C' | 11-OH-Int-C'2 | Int-E' | GTX5 | GTX4 | C2  | C1  |
|-----|----------|--------|---------|-----------|---------------|--------|------|------|-----|-----|
| 3   | -162     | 0      | ND      | ND        | -7            | ND     | -5   | -4   | 10  | -31 |
| 6   | 73       | 8      | ND      | 12        | 15            | 15     | 42   | 9    | 136 | -14 |
| 10  | 75       | 4      | 7       | 5         | 3             | 9      | 13   | 14   | 61  | -6  |

ND: not determined

Table S-5. <sup>15</sup>N incorporation and their ratio calculated by three-population model for the isotopomer distribution % of Day 6 and Day 10

| Arginine 6d |     |       |    | Int-E' 6d |     |       |    |
|-------------|-----|-------|----|-----------|-----|-------|----|
| 15N %       |     | Ratio |    | 15N %     |     | Ratio |    |
| p           | 99% | A     | 3  | p         | 99% | A     | 3  |
| q           | 69% | B     | 42 | q         | 67% | B     | 72 |
| r           | 0%  | C     | 55 | r         | 29% | C     | 25 |

  

| Arginine 10d |     |       |    | Int-E' 10d |     |       |    |
|--------------|-----|-------|----|------------|-----|-------|----|
| 15N %        |     | Ratio |    | 15N %      |     | Ratio |    |
| p            | 99% | A     | 11 | p          | 96% | A     | 5  |
| q            | 76% | B     | 78 | q          | 79% | B     | 86 |
| r            | 0%  | C     | 11 | r          | 32% | C     | 9  |

  

| Int-A' 6d |     |       |    | GTX5 6d |     |       |    |
|-----------|-----|-------|----|---------|-----|-------|----|
| 15N %     |     | Ratio |    | 15N %   |     | Ratio |    |
| p         | 90% | A     | 19 | p       | 60% | A     | 23 |
| q         | 89% | B     | 5  | q       | 22% | B     | 16 |
| r         | 0%  | C     | 76 | r       | 0%  | C     | 61 |

  

| Int-A' 10d |     |       |    | GTX5 10d |     |       |    |
|------------|-----|-------|----|----------|-----|-------|----|
| 15N %      |     | Ratio |    | 15N %    |     | Ratio |    |
| p          | 84% | A     | 2  | p        | 80% | A     | 47 |
| q          | 83% | B     | 71 | q        | 53% | B     | 25 |
| r          | 0%  | C     | 27 | r        | 1%  | C     | 28 |

  

| Int-C'2 |  |       |  | GTX4 6d |     |       |    |
|---------|--|-------|--|---------|-----|-------|----|
| 15N %   |  | Ratio |  | 15N %   |     | Ratio |    |
| p       |  | A     |  | p       | 65% | A     | 16 |
| q       |  | B     |  | q       | 14% | B     | 8  |
| r       |  | C     |  | r       | 0%  | C     | 76 |

  

| Int-C'2 10d |     |       |    | GTX4 10d |     |       |    |
|-------------|-----|-------|----|----------|-----|-------|----|
| 15N %       |     | Ratio |    | 15N %    |     | Ratio |    |
| p           | 99% | A     | 13 | p        | 77% | A     | 49 |
| q           | 70% | B     | 85 | q        | 38% | B     | 14 |
| r           | 0%  | C     | 2  | r        | 1%  | C     | 37 |

  

| 11-hydroxy-Int-C'2 6d |     |       |    | C2 6d |     |       |    |
|-----------------------|-----|-------|----|-------|-----|-------|----|
| 15N %                 |     | Ratio |    | 15N % |     | Ratio |    |
| p                     | 81% | A     | 23 | p     | 92% | A     | 1  |
| q                     | 49% | B     | 31 | q     | 56% | B     | 14 |
| r                     | 2%  | C     | 46 | r     | 0%  | C     | 85 |

  

| 11-hydroxy-Int-C'2 10d |     |       |    | C2 10d |     |       |    |
|------------------------|-----|-------|----|--------|-----|-------|----|
| 15N %                  |     | Ratio |    | 15N %  |     | Ratio |    |
| p                      | 87% | A     | 34 | p      | 77% | A     | 49 |
| q                      | 58% | B     | 40 | q      | 42% | B     | 13 |
| r                      | 3%  | C     | 26 | r      | 1%  | C     | 38 |

  

| C1 10d |     |       |    |
|--------|-----|-------|----|
| 15N %  |     | Ratio |    |
| p      | 90% | A     | 8  |
| q      | 52% | B     | 13 |
| r      | 0%  | C     | 79 |

Table S-6. The detection limits (fmol/cell) for non-toxic species *A. insuetum* and *P. triestinum*

|                    | <i>A. insuetum</i><br>NIES-678 | <i>P. triestinum</i><br>Ptri060930Ohi |
|--------------------|--------------------------------|---------------------------------------|
| C1                 | < 0.74                         | < 0.04                                |
| C2                 | < 0.60                         | < 0.03                                |
| C3                 | < 6.19                         | < 0.30                                |
| C4                 | < 2.26                         | < 0.11                                |
| GTX1               | < 1.43                         | < 0.07                                |
| GTX2               | < 1.94                         | < 0.09                                |
| GTX3               | < 2.52                         | < 0.12                                |
| GTX4               | < 0.37                         | < 0.02                                |
| GTX5               | < 1.02                         | < 0.05                                |
| GTX6               | < 0.55                         | < 0.03                                |
| neoSTX             | < 2.25                         | < 0.11                                |
| dcSTX              | < 0.53                         | < 0.03                                |
| STX                | < 0.24                         | < 0.01                                |
| Int-A'             | < 0.05                         | < 0.002                               |
| Int-C'2            | < 0.05                         | < 0.002                               |
| 11-hydroxy-Int-C'2 | < 8.55                         | < 0.41                                |
| Int-E'             | < 4.59                         | < 0.22                                |
| Cyclic-C'          | < 0.06                         | < 0.003                               |



### **Optimization of Chromabond<sup>R</sup> HILIC SPE conditions using the non-labelled standard**

The SPE treatment for sample preparation prior to the HR-HILIC-quadrupole time-of-flight (Q-Tof) MS was modified from the previously described method developed for STXs [43]. Since the ZIC-HILIC<sup>R</sup> SPE used in the original method is not commercially available so far, this reagent was replaced with Chromabond<sup>R</sup> HILIC, a sorbent that has the same functional group. Moreover, the recovery rate of the biosynthetic intermediates was very low by the original method [43], which therefore was modified to permit the simultaneous analysis of both the labelled biosynthetic intermediates and the STXs. In the previous paper [15], cell pellets were lyophilized to recover the relatively less-polar compounds corresponding to the biosynthetic intermediates from early stages of the pathway, namely arginine, Int-A', and Int-C'2. For example, recovery of Int-C'2 was 5% by the original procedure [15]. Moreover lyophilization is time-consuming and difficult to apply for the multiple samples expected from a time-course study. Therefore, a clean-up procedure without lyophilization was developed. Simply performing the original procedure without lyophilization yielded low amounts of Int-A' and Int-C'2 (Supplementary Information Table S-2, Entry 1). The use of THF for application and washing of the sample yielded improved recovery of these biosynthetic intermediates. However, attempts at elution with 0.5 M acetic acid or 0.2 M formic acid directly after THF washing did not permit recovery of GTX4, C1, or C2 (Entry 2). Stepwise washing with THF, acetonitrile, and 95% acetonitrile containing 0.1% formic acid improved the elution of these STXs with 0.2 M formic acid (Entry 3). The recovery rates of the main toxins and the biosynthetic intermediates from 50 mg of Chromabond<sup>R</sup> HILIC adsorbent were determined using a standard mixture prepared at a concentration range similar to that observed experimentally in the cell extracts of dinoflagellate cultures. The elution volume was set to 200  $\mu$ L to enable direct analysis without the need for a concentration step, although the recovery rate could be improved by using a higher volume of elution solution.

### **Optimized sample clean-up for HR HILIC-ESI-Q-tof-MS and MS/MS**

Aliquots of the harvested cultures were used to obtain cell counts by microscopy. The cultures (20 mL each) then were centrifuged at 1,700 g for 5 min at 4° C to pellet the cells. After removal of the supernatant, the pellet was transferred to a new micro-tube, re-suspended, and pelleted again by centrifugation. After removal of the supernatant, the pellet was re-suspended in 300 µL of 0.5 M acetic acid. Samples were stored at -30° C until use. After thawing on ice, the cell suspension was subjected to sonication (three cycles at 100 Hz, 40% amplitude, for 30 s on ice with 30 s intervals). The homogenate was centrifuged at 20,000 g for 5 min at 4° C. The supernatant of each sample was subjected to ultra-filtration (Ultra-Free C3LGC, 10,000-Da cut-off, Millipore) at 4° C. An aliquot (100 µL) of the resulting filtrate was transferred to a new tube and mixed with three volumes of THF. In parallel, a column of Chromabond<sup>R</sup> HILIC adsorbent (50 mg, MACHEREY-NAGEL) was generated by packing into a disposable empty cartridge (syringe type cartridge (CS0111, S size) and frits (CF0003), Tomoe, Amagasaki, Japan) and conditioned with 200 µL of MilliQ water and 1 mL of THF. The sample was loaded onto the column and the column was sequentially washed with 500 µL of THF, 500 µL of CH<sub>3</sub>CN, and 500 µL of CH<sub>3</sub>CN/water/HCOOH (95:5:0.1, v/v/v). The column was eluted with 200 µL of 0.2 M HCOOH and an aliquot of the eluate (10 or 20 µL) was subjected to LC-MS.

For the MS/MS sample, a Chromabond<sup>R</sup> HILIC polypropylene column (500-mg) was pre-conditioned with 1 mL of MilliQ water and 5 mL of THF. The total extract from a 20-mL culture was loaded onto the column, and the column then was sequentially washed with 3 mL of THF, 3 mL of CH<sub>3</sub>CN, and 3 mL of CH<sub>3</sub>CN/water/HCOOH (95:5:0.1, v/v/v). The column was eluted with 3 mL of 0.2 M HCOOH and the eluate was concentrated under a stream of nitrogen gas. After reconstitution with 100 µL of MilliQ water, the sample was filtered through a CosmoSpin filter H (0.45 µm) and an aliquot of the eluate (10 µL) was subjected to LC-MS/MS .

### **The linearity, detection limit and retention time of standard of modified column-switching HR HILIC-ESI-Q-tof-MS**

The standards (GTX1 and 4, GTX2 and 3, C1 and C2) were used as a mixture of the stereoisomers at a ratio of equilibrium. The stock solutions of STXs and the synthetic standards of the biosynthetic intermediates were stored in 0.05 M acetic acid and 0.5 M acetic acid, respectively, at  $-30^{\circ}$  C. The stock solutions were diluted with 0.5 M acetic acid to yield dilutions appropriate to the sensitivity of each analysis. The linearity of the calibration curve was 0.997 (C2) – 0.999 (Int-C'2) in the range of 0.4 – 4.3  $\mu$ M (C2), 0.3 – 13.9  $\mu$ M (GTX5), 0.5 – 10.4  $\mu$ M (GTX4), 1.0 – 19.8  $\mu$ M (C1), 0.1 – 1.0  $\mu$ M (Int-A'), 0.05 – 2.5  $\mu$ M (arginine), 0.01 – 1.0  $\mu$ M (Int-C'2), and 0.25 – 1.0  $\mu$ M (11-hydroxyl-Int-C'2, Int-E' and Cyclic-C'). The detection limit (S/N = 5) of the standard ranged from 0.01  $\mu$ M (Int-C'2) to 0.3  $\mu$ M (C2) for 10-  $\mu$ L injections. The retention times were 12.3, 13.2, 24.9, 25.1, 27.8, 30.1, 30.6, 31.0, 34.9, and 35.2 min for Int-C'2, Cyclic-C', Int-A', 11-hydroxyl-Int-C'2, arginine, C1, Int-E', GTX4, GTX5, and C2, respectively. The primary metabolites that might affect the mass spectra of these target molecules were analyzed to determine retention times. Notably, the primary metabolites acetyl-ornithine ( $C_7H_{15}N_2O_3^+$ ,  $[M+H]^+ = m/z$  175.1077) and citrullin ( $C_6H_{14}N_3O_3^+$ ,  $[M+H]^+ = m/z$  176.1030) either of which might affect the intensity of isotopomers for arginine ( $C_6H_{15}N_4O_2^+$ ,  $[M+H]^+ = m/z$  175.1190,  $m+1$   $C_6H_{15}N_3^{15}N O_2^+$ ,  $[M+H]^+ = m/z$  176.1160), eluted at 14.8 and 14.6 min, respectively. Thus, neither of these metabolites should influence the intensity of the isotopomers of arginine that eluted at 27.8 min. Acetyl-lysine ( $C_8H_{17}N_2O_3^+$ ,  $[M+H]^+ = m/z$  189.1234) eluted at 13.1 min, and therefore should not overlap with Int-A' ( $m+2$ ,  $C_8H_{19}N_2^{15}N_2O^+$ ,  $[M+H]^+ = m/z$  189.1494), which itself eluted at 24.9 min.

### **Validation by the highly labelled sample mixed with the non-labelled standard**

The two-month exposure was initiated in the same manner as the time-course study and passage was carried out three times for a total interval of two months (each passage was performed at 2 weeks). After 2 months, the cell cultures had achieved a cell density of  $5 \times 10^3$  cells mL<sup>-1</sup> and aliquots (60 mL each) were harvested by centrifugation at 890 g for 3 min at 4 °C. The supernatants were decanted and discarded. Each cell pellet was re-suspended in 300 µL of 0.5 M acetic acid and stored at -30 °C until analysis. The mono-isotopic ions of the non-labelled compounds were not detected except for arginine; the completely labelled isotopomers constituted the primary peak for each compound (Supplementary Information Fig. S-13). After ultrafiltration, the filtrate was mixed with a standard solution containing arginine, Int-A', Int-C'2, C1, C2, and GTX1-5 at final concentrations of 5.0, 0.5, 0.5, 4.9, 1.1, 7.6, 2.2, 0.8, 2.6, and 3.5 µM, respectively. The same procedure was performed for the control (without standard) sample and the standard mixture only. The recovery rates were calculated as follows: the area of mono-isotopic ion in the fortified sample minus that of the control was divided by that of the standard solution treated the same as the fortified sample. The samples for the validation study were prepared in triplicate. For the evaluation of matrix effects, the eluates of un-mixed cell extract from Chromabond<sup>R</sup> HILIC sorbent were mixed with the standard solution. The matrix effects were calculated as follows: the area of mono-isotopic ion in the mixed sample minus the area of the control was divided by that of the standard solution. The values of recovery rate and matrix effect of Int-C'2 and those of arginine were used for Cyclic-C', 11-hydroxyl-Int-C'2 and Int-E'. The relative % was calculated as follows: the area of mono-isotopic ion in the mixed sample minus that of the control was divided by the sum of the areas of all isotopomers containing <sup>15</sup>N as observed in the EICs of the fortified samples.

## Calculation of peak area removing the contribution of the naturally occurring stable isotopes

The concept of calculation

Arginine, Int-A', 11-hydroxy-Int-C'2, Int-E' and consist of C, H, O, and N. Int-C'2 consists of C, H, and N. STXs (GTX4, GTX5, C1, and C2) consist of C, H, O, N, and S. Therefore, the  $^{15}\text{N}$ -labelled compounds contain not only the incorporated  $^{15}\text{N}$ , but also the naturally occurring stable isotopes such as  $^{13}\text{C}$ ,  $^2\text{H}$ ,  $^{17}\text{O}$ ,  $^{18}\text{O}$ ,  $^{15}\text{N}$ ,  $^{33}\text{S}$ , and  $^{34}\text{S}$ . To obtain the newly synthesized isotopomer peak areas, it is necessary to remove the contribution by these naturally occurring stable isotopes. Since the natural abundances of the stable isotopes  $^{13}\text{C}$ ,  $^{15}\text{N}$ ,  $^{18}\text{O}$ , and  $^{34}\text{S}$  are 1.07, 0.364, 0.205 and 4.25%, respectively, two different isotopomers with the same nominal mass can exist for compounds containing these atoms. Since the mass spectrometer used in this study could not distinguish these isotopomers, the total of the theoretical natural abundances of two isotopomers having the same nominal mass with different formulae was used. For example, the natural abundances for C2  $[\text{M}-\text{SO}_3]^+$  were  $m/z$  396.0932 (100.0%), 397.0966 (10.8%), 398.0890 (4.5%), 397.0902 (2.6%), and 398.0975 (1.6%). The theoretical natural abundance for  $m+1$  ( $m/z$  397) was 13.4% and that for  $m+2$  ( $m/z$  398) was 6.1%. Please see Table S-3 for the example of the calculation.

### **Quantitation of the biosynthetic intermediates, the shunt product, and STXs in non-toxic and toxic dinoflagellates using column-switching HILIC- MS/MS (MRM)**

Aliquots of cultured cells (15 mL of *A. insuetum* (NIES-678) at  $5.7 \times 10^3$  cells mL<sup>-1</sup>, 20 mL of *P. triestinum* (Ptri060930Ohi) at  $1.2 \times 10^5$  cells mL<sup>-1</sup>, and 10 mL of *G. catenatum* (GC-18) at  $2.8 \times 10^3$  cells mL<sup>-1</sup>) were centrifuged at 1700 g (*A. insuetum* and *P. triestinum*) or 2300 g (*G. catenatum*) for 5 min to pellet the cells. The pellets were re-suspended in 300  $\mu$ L of 0.5 M acetic acid, and the cells were disrupted by sonication (3 times at 100 Hz for 30 sec on, 30 sec off) on ice. The suspensions then were centrifuged (20,000 g for 5 min at 4 °C), and the resulting supernatants were subjected to ultra-filtration (Ultra-Free C3LGC, 10-kDa cut-off, Millipore). Triplicate samples were prepared for each strain. An aliquot of each filtrate was subjected to quantitative analysis by HILIC-MS-MRM (10  $\mu$ L) using an API2000 triple-quadrupole tandem MS equipped with an ESI source, as described previously [20].
